# Supplementary material
Source: MDPI journal article supplement (https://www.mdpi.com/2304-6740/9/1/5)

# checkCIF/PLATON report

Structure factors have been supplied for datablock(s) 20023

THIS REPORT IS FOR GUIDANCE ONLY. IF USED AS PART OF A REVIEW PROCEDURE FOR PUBLICATION, IT SHOULD NOT REPLACE THE EXPERTISE OF AN EXPERIENCED CRYSTALLOGRAPHIC REFEREE.

No syntax errors found.      CIF dictionary      Interpreting this report

## Datablock: 20023

---

|                 |                         |                              |
|-----------------|-------------------------|------------------------------|
| Bond precision: | C-C = 0.0054 Å          | Wavelength=0.71073           |
| Cell:           | a=13.926(3)             | b=13.293(3)      c=14.251(3) |
|                 | alpha=90                | beta=97.527(4)      gamma=90 |
| Temperature:    | 150 K                   |                              |
|                 | Calculated              | Reported                     |
| Volume          | 2615.4(10)              | 2615.3(11)                   |
| Space group     | P 21/n                  | P 1 21/n 1                   |
| Hall group      | -P 2yn                  | -P 2yn                       |
| Moiety formula  | C26 H22 Cu N3 O S, F6 P | C26 H22 Cu N3 O S, F6 P      |
| Sum formula     | C26 H22 Cu F6 N3 O P S  | C26 H22 Cu F6 N3 O P S       |
| Mr              | 633.05                  | 633.03                       |
| Dx,g cm-3       | 1.608                   | 1.608                        |
| Z               | 4                       | 4                            |
| Mu (mm-1)       | 1.045                   | 1.045                        |
| F000            | 1284.0                  | 1284.0                       |
| F000'           | 1286.84                 |                              |
| h,k,lmax        | 17,16,17                | 17,16,17                     |
| Nref            | 5129                    | 5119                         |
| Tmin,Tmax       | 0.612,0.762             | 0.636,0.843                  |
| Tmin'           | 0.600                   |                              |

Correction method= # Reported T Limits: Tmin=0.636 Tmax=0.843  
AbsCorr = EMPIRICAL

Data completeness= 0.998      Theta(max)= 25.997

R(reflections)= 0.0545( 3696)      wR2(reflections)= 0.1282( 5119)

S = 0.996      Npar= 390

---

The following ALERTS were generated. Each ALERT has the format

**test-name\_ALERT\_alert-type\_alert-level.**

Click on the hyperlinks for more details of the test.

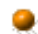

#### Alert level B

PLAT232\_ALERT\_2\_B Hirshfeld Test Diff (M-X) Cu1 --S1 . 20.1 s.u.

**Author Response: The assignment of both Cu1 and S1 is correct and no residual disorder components are present.**

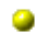

#### Alert level C

PLAT906\_ALERT\_3\_C Large K Value in the Analysis of Variance ..... 7.121 Check  
PLAT911\_ALERT\_3\_C Missing FCF Refl Between Thmin & STh/L= 0.600 8 Report

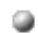

#### Alert level G

PLAT002\_ALERT\_2\_G Number of Distance or Angle Restraints on AtSite 11 Note  
PLAT003\_ALERT\_2\_G Number of Uiso or Uij Restrained non-H Atoms ... 11 Report  
PLAT176\_ALERT\_4\_G The CIF-Embedded .res File Contains SADI Records 1 Report  
PLAT178\_ALERT\_4\_G The CIF-Embedded .res File Contains SIMU Records 1 Report  
PLAT232\_ALERT\_2\_G Hirshfeld Test Diff (M-X) Cu1 --N2 . 5.6 s.u.

**Author Response: The assignment of both Cu1 and S1 is correct and no residual disorder components are present.**

PLAT244\_ALERT\_4\_G Low 'Solvent' Ueq as Compared to Neighbors of P1 Check  
PLAT302\_ALERT\_4\_G Anion/Solvent/Minor-Residue Disorder (Resd 2 ) 57% Note  
PLAT794\_ALERT\_5\_G Tentative Bond Valency for Cu1 (II) . 2.27 Info  
PLAT802\_ALERT\_4\_G CIF Input Record(s) with more than 80 Characters 1 Info  
PLAT860\_ALERT\_3\_G Number of Least-Squares Restraints ..... 153 Note  
PLAT912\_ALERT\_4\_G Missing # of FCF Reflections Above STh/L= 0.600 2 Note  
PLAT933\_ALERT\_2\_G Number of OMIT Records in Embedded .res File ... 1 Note  
PLAT941\_ALERT\_3\_G Average HKL Measurement Multiplicity ..... 3.9 Low  
PLAT978\_ALERT\_2\_G Number C-C Bonds with Positive Residual Density. 1 Info

---

0 **ALERT level A** = Most likely a serious problem - resolve or explain  
1 **ALERT level B** = A potentially serious problem, consider carefully  
2 **ALERT level C** = Check. Ensure it is not caused by an omission or oversight  
14 **ALERT level G** = General information/check it is not something unexpected

0 ALERT type 1 CIF construction/syntax error, inconsistent or missing data  
6 ALERT type 2 Indicator that the structure model may be wrong or deficient  
4 ALERT type 3 Indicator that the structure quality may be low  
6 ALERT type 4 Improvement, methodology, query or suggestion  
1 ALERT type 5 Informative message, check

---

It is advisable to attempt to resolve as many as possible of the alerts in all categories. Often the minor alerts point to easily fixed oversights, errors and omissions in your CIF or refinement strategy, so attention to these fine details can be worthwhile. In order to resolve some of the more serious problems it may be necessary to carry out additional measurements or structure refinements. However, the purpose of your study may justify the reported deviations and the more serious of these should normally be commented upon in the discussion or experimental section of a paper or in the "special\_details" fields of the CIF. checkCIF was carefully designed to identify outliers and unusual parameters, but every test has its limitations and alerts that are not important in a particular case may appear. Conversely, the absence of alerts does not guarantee there are no aspects of the results needing attention. It is up to the individual to critically assess their own results and, if necessary, seek expert advice.

### **Publication of your CIF in IUCr journals**

A basic structural check has been run on your CIF. These basic checks will be run on all CIFs submitted for publication in IUCr journals (*Acta Crystallographica*, *Journal of Applied Crystallography*, *Journal of Synchrotron Radiation*); however, if you intend to submit to *Acta Crystallographica Section C* or *E* or *IUCrData*, you should make sure that full publication checks are run on the final version of your CIF prior to submission.

### **Publication of your CIF in other journals**

Please refer to the *Notes for Authors* of the relevant journal for any special instructions relating to CIF submission.

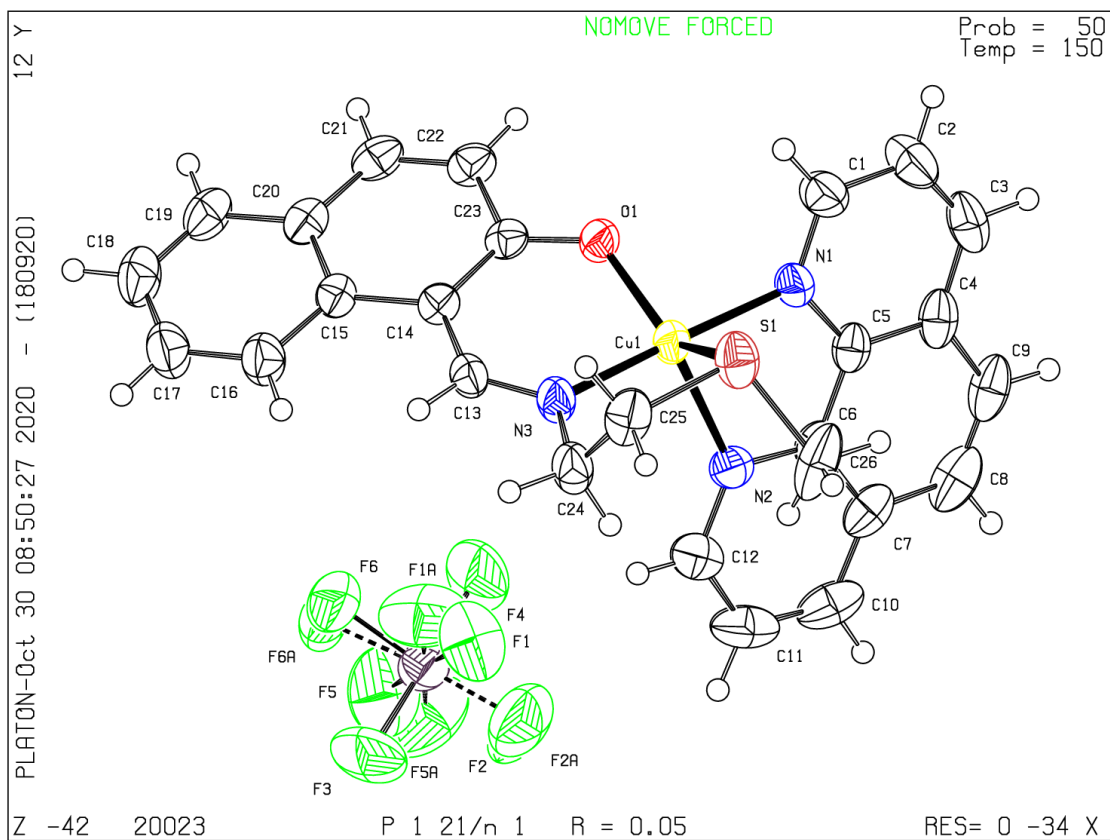

Supplement: s1 [file s1]
