# Supplementary material
Source: MDPI journal article supplement (https://www.mdpi.com/2304-6740/9/1/5)

# checkCIF/PLATON report

Structure factors have been supplied for datablock(s) 20012

THIS REPORT IS FOR GUIDANCE ONLY. IF USED AS PART OF A REVIEW PROCEDURE FOR PUBLICATION, IT SHOULD NOT REPLACE THE EXPERTISE OF AN EXPERIENCED CRYSTALLOGRAPHIC REFEREE.

No syntax errors found.      CIF dictionary      Interpreting this report

## Datablock: 20012

---

|                 |                         |                               |
|-----------------|-------------------------|-------------------------------|
| Bond precision: | C-C = 0.0083 A          | Wavelength=0.71073            |
| Cell:           | a=8.471(4)              | b=17.550(9)      c=18.443(9)  |
|                 | alpha=90                | beta=99.605(11)      gamma=90 |
| Temperature:    | 150 K                   |                               |
|                 | Calculated              | Reported                      |
| Volume          | 2703(2)                 | 2703(2)                       |
| Space group     | P 21/c                  | P 1 21/c 1                    |
| Hall group      | -P 2ybc                 | -P 2ybc                       |
| Moiety formula  | C27 H24 Cu N3 O S, F6 P | C27 H24 Cu N3 O S, F6 P       |
| Sum formula     | C27 H24 Cu F6 N3 O P S  | C27 H24 Cu F6 N3 O P S        |
| Mr              | 647.07                  | 647.06                        |
| Dx,g cm-3       | 1.590                   | 1.590                         |
| Z               | 4                       | 4                             |
| Mu (mm-1)       | 1.013                   | 1.013                         |
| F000            | 1316.0                  | 1316.0                        |
| F000'           | 1318.85                 |                               |
| h,k,lmax        | 10,21,22                | 10,21,22                      |
| Nref            | 5315                    | 5307                          |
| Tmin,Tmax       | 0.854,0.960             | 0.568,0.843                   |
| Tmin'           | 0.615                   |                               |

Correction method= # Reported T Limits: Tmin=0.568 Tmax=0.843  
AbsCorr = EMPIRICAL

Data completeness= 0.998      Theta(max)= 25.999

R(reflections)= 0.0636( 2647)      wR2(reflections)= 0.1426( 5307)

S = 0.886      Npar= 498

---

The following ALERTS were generated. Each ALERT has the format  
**test-name\_ALERT\_alert-type\_alert-level.**  
Click on the hyperlinks for more details of the test.

---

## ● Alert level C

RINTA01\_ALERT\_3\_C The value of Rint is greater than 0.12  
Rint given 0.122  
PLAT341\_ALERT\_3\_C Low Bond Precision on C-C Bonds ..... 0.00829 Ang.  
PLAT410\_ALERT\_2\_C Short Intra H...H Contact H19 ..H20 . 1.99 Ang.  
x,y,z = 1\_555 Check  
PLAT906\_ALERT\_3\_C Large K Value in the Analysis of Variance ..... 18.321 Check  
PLAT906\_ALERT\_3\_C Large K Value in the Analysis of Variance ..... 3.886 Check  
PLAT911\_ALERT\_3\_C Missing FCF Refl Between Thmin & STh/L= 0.600 4 Report

---

## ● Alert level G

PLAT002\_ALERT\_2\_G Number of Distance or Angle Restraints on AtSite 27 Note  
PLAT003\_ALERT\_2\_G Number of Uiso or Uij Restrained non-H Atoms ... 27 Report  
PLAT020\_ALERT\_3\_G The Value of Rint is Greater Than 0.12 ..... 0.122 Report  
PLAT176\_ALERT\_4\_G The CIF-Embedded .res File Contains SADI Records 8 Report  
PLAT178\_ALERT\_4\_G The CIF-Embedded .res File Contains SIMU Records 2 Report  
PLAT187\_ALERT\_4\_G The CIF-Embedded .res File Contains RIGU Records 1 Report  
PLAT244\_ALERT\_4\_G Low 'Solvent' Ueq as Compared to Neighbors of P1 Check  
PLAT300\_ALERT\_4\_G Atom Site Occupancy of F1 Constrained at 0.45 Check  
PLAT300\_ALERT\_4\_G Atom Site Occupancy of F1A Constrained at 0.3 Check  
PLAT300\_ALERT\_4\_G Atom Site Occupancy of F1B Constrained at 0.25 Check  
PLAT300\_ALERT\_4\_G Atom Site Occupancy of F2 Constrained at 0.45 Check  
PLAT300\_ALERT\_4\_G Atom Site Occupancy of F2A Constrained at 0.3 Check  
PLAT300\_ALERT\_4\_G Atom Site Occupancy of F2B Constrained at 0.25 Check  
PLAT300\_ALERT\_4\_G Atom Site Occupancy of F3 Constrained at 0.45 Check  
PLAT300\_ALERT\_4\_G Atom Site Occupancy of F3A Constrained at 0.3 Check  
PLAT300\_ALERT\_4\_G Atom Site Occupancy of F3B Constrained at 0.25 Check  
PLAT300\_ALERT\_4\_G Atom Site Occupancy of F4 Constrained at 0.45 Check  
PLAT300\_ALERT\_4\_G Atom Site Occupancy of F4A Constrained at 0.3 Check  
PLAT300\_ALERT\_4\_G Atom Site Occupancy of F4B Constrained at 0.25 Check  
PLAT300\_ALERT\_4\_G Atom Site Occupancy of F5 Constrained at 0.45 Check  
PLAT300\_ALERT\_4\_G Atom Site Occupancy of F5A Constrained at 0.3 Check  
PLAT300\_ALERT\_4\_G Atom Site Occupancy of F5B Constrained at 0.25 Check  
PLAT300\_ALERT\_4\_G Atom Site Occupancy of F6 Constrained at 0.45 Check  
PLAT300\_ALERT\_4\_G Atom Site Occupancy of F6A Constrained at 0.3 Check  
PLAT300\_ALERT\_4\_G Atom Site Occupancy of F6B Constrained at 0.25 Check  
PLAT301\_ALERT\_3\_G Main Residue Disorder .....(Resd 1 ) 9% Note  
PLAT302\_ALERT\_4\_G Anion/Solvent/Minor-Residue Disorder (Resd 2 ) 86% Note  
PLAT410\_ALERT\_2\_G Short Intra H...H Contact H19 ..H24C . 2.14 Ang.  
x,y,z = 1\_555 Check  
PLAT432\_ALERT\_2\_G Short Inter X...Y Contact F3B ..C12 2.79 Ang.  
x,y,z = 1\_555 Check  
PLAT802\_ALERT\_4\_G CIF Input Record(s) with more than 80 Characters 7 Info  
PLAT811\_ALERT\_5\_G No ADDSYM Analysis: Too Many Excluded Atoms .... ! Info  
PLAT860\_ALERT\_3\_G Number of Least-Squares Restraints ..... 1249 Note  
PLAT912\_ALERT\_4\_G Missing # of FCF Reflections Above STh/L= 0.600 4 Note  
PLAT941\_ALERT\_3\_G Average HKL Measurement Multiplicity ..... 4.0 Low  
PLAT978\_ALERT\_2\_G Number C-C Bonds with Positive Residual Density. 0 Info

---

- 0 **ALERT level A** = Most likely a serious problem - resolve or explain  
0 **ALERT level B** = A potentially serious problem, consider carefully  
6 **ALERT level C** = Check. Ensure it is not caused by an omission or oversight  
35 **ALERT level G** = General information/check it is not something unexpected
- 0 ALERT type 1 CIF construction/syntax error, inconsistent or missing data  
6 ALERT type 2 Indicator that the structure model may be wrong or deficient  
9 ALERT type 3 Indicator that the structure quality may be low  
25 ALERT type 4 Improvement, methodology, query or suggestion  
1 ALERT type 5 Informative message, check

---

---

It is advisable to attempt to resolve as many as possible of the alerts in all categories. Often the minor alerts point to easily fixed oversights, errors and omissions in your CIF or refinement strategy, so attention to these fine details can be worthwhile. In order to resolve some of the more serious problems it may be necessary to carry out additional measurements or structure refinements. However, the purpose of your study may justify the reported deviations and the more serious of these should normally be commented upon in the discussion or experimental section of a paper or in the "special\_details" fields of the CIF. checkCIF was carefully designed to identify outliers and unusual parameters, but every test has its limitations and alerts that are not important in a particular case may appear. Conversely, the absence of alerts does not guarantee there are no aspects of the results needing attention. It is up to the individual to critically assess their own results and, if necessary, seek expert advice.

### **Publication of your CIF in IUCr journals**

A basic structural check has been run on your CIF. These basic checks will be run on all CIFs submitted for publication in IUCr journals (*Acta Crystallographica*, *Journal of Applied Crystallography*, *Journal of Synchrotron Radiation*); however, if you intend to submit to *Acta Crystallographica Section C* or *E* or *IUCrData*, you should make sure that full publication checks are run on the final version of your CIF prior to submission.

### **Publication of your CIF in other journals**

Please refer to the *Notes for Authors* of the relevant journal for any special instructions relating to CIF submission.

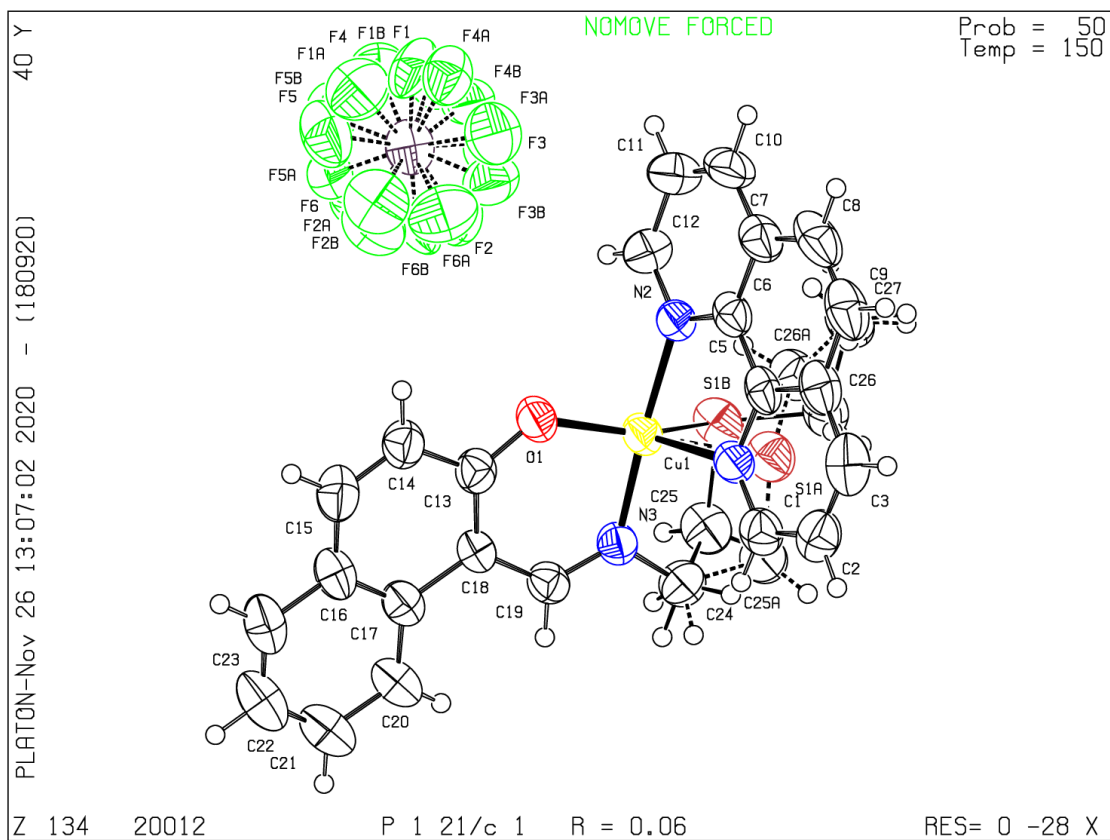

Supplement: s1 [file s1]
