# Supplementary material
Source: MDPI journal article supplement (https://www.mdpi.com/2304-6740/9/1/5)
Supplement: s1 [file s1]

# Supplementary Materials: Breast Cancer Stem Cell Active Copper(II) Complexes with Naphthol Schiff Base and Polypyridyl Ligands

## Table of Content

- Figure S1.** Chemical structures of the Schiff base ligand **L**<sup>1</sup> and the copper(II) complex **1** containing **L**<sup>1</sup> and 4,7-diphenyl-1,10-phenanthroline. The copper(II) complex **1** was previously shown by our group to kill breast cancer stem cells (CSCs) via cytotoxic and immunogenic mechanisms.
- Figure S2.** <sup>1</sup>H NMR spectrum of **L**<sup>2</sup> in DMSO-d<sub>6</sub>.
- Figure S3.** <sup>13</sup>C{<sup>1</sup>H} NMR spectrum of **L**<sup>2</sup> in DMSO-d<sub>6</sub>.
- Figure S4.** HR-ESI mass spectrum (positive mode) of **L**<sup>2</sup>.
- Figure S5.** <sup>1</sup>H NMR spectrum of **L**<sup>3</sup> in DMSO-d<sub>6</sub>.
- Figure S6.** <sup>13</sup>C{<sup>1</sup>H} NMR spectrum of **L**<sup>3</sup> in DMSO-d<sub>6</sub>.
- Figure S7.** HR-ESI mass spectrum (positive mode) of **L**<sup>3</sup>.
- Figure S8.** IR spectrum of (A) **L**<sup>2</sup>, (B) **L**<sup>3</sup>, (C) **2**, (D) **3**, (E) **4**, and (F) **5** in the solid form.
- Figure S9.** <sup>1</sup>H NMR spectrum of 2-hydroxy-1-naphthaldehyde in DMSO-d<sub>6</sub>.
- Figure S10.** <sup>13</sup>C{<sup>1</sup>H} NMR spectrum of 2-hydroxy-1-naphthaldehyde in DMSO-d<sub>6</sub>.
- Figure S11.** HR-ESI mass spectrum (positive mode) of **2**.
- Figure S12.** HR-ESI mass spectrum (positive mode) of **3**.
- Figure S13.** HR-ESI mass spectrum (positive mode) of **4**.
- Figure S14.** HR-ESI mass spectrum (positive mode) of **5**.
- Table S1.** Crystallographic data for **2** and **3**.
- Table S2.** Selected bond lengths (Å) and angles (°) for **2**.
- Table S3.** Selected bond lengths (Å) and angles (°) for **3**.
- Table S4.** Experimentally determined LogP values for **2**–**5**.
- Figure S15.** UV-Vis spectrum of **2** (50 μM) in the presence of ascorbic acid (500 μM) in PBS:DMSO (200:1) over the course of 24 h at 37 °C.
- Figure S16.** UV-Vis spectrum of **4** (50 μM) in the presence of ascorbic acid (500 μM) in PBS:DMSO (200:1) over the course of 24 h at 37 °C.
- Figure S17.** UV-Vis spectrum of **2** (50 μM) in the presence of ascorbic acid (500 μM) and bathocuproine disulfonate, BCS (100 μM) in PBS:DMSO (200:1) over the course of 24 h at 37 °C.
- Figure S18.** UV-Vis spectrum of **4** (50 μM) in the presence of ascorbic acid (500 μM) and bathocuproine disulfonate, BCS (100 μM) in PBS:DMSO (200:1) over the course of 24 h at 37 °C.
- Figure S19.** UV-Vis spectrum of **2** (50 μM) in mammary epithelial cell growth medium (MEGM):DMSO (200:1) over the course of 24 h at 37 °C.
- Figure S20.** UV-Vis spectrum of **4** (50 μM) in mammary epithelial cell growth medium (MEGM):DMSO (200:1) over the course of 24 h at 37 °C.
- Figure S21.** Representative dose-response curves for the treatment of HMLER and HMLER-shEcad cells with **2**.
- Figure S22.** Representative dose-response curves for the treatment of HMLER and HMLER-shEcad cells with **3**.
- Figure S23.** Representative dose-response curves for the treatment of HMLER and HMLER-shEcad cells with **4**.
- Figure S24.** Representative dose-response curves for the treatment of HMLER and HMLER-shEcad cells with **5**.
- Figure S25.** Representative dose-response curves for the treatment of HMLER and HMLER-shEcad cells with **L**<sup>2</sup>.

- Figure S26.** Representative dose-response curves for the treatment of HMLER and HMLER-shEcad cells with **L**<sup>3</sup>.
- Figure S27.** Bright-field images (taken using an inverted microscope) representative of untreated HMLER-shEcad mammospheres and those treated with salinomycin for 5 days at its IC<sub>20</sub> values. Scale bar = 160 µm.
- Figure S28.** Bright-field images (taken using an inverted microscope) representative of untreated HMLER-shEcad mammospheres and those treated with **L**<sup>2</sup> or **L**<sup>3</sup> for 5 days at their respective IC<sub>20</sub> values. Scale bar = 100 µm.
- Figure S29.** Representative dose-response curve for the treatment of HMLER-shEcad mammospheres with **2** after 5 days incubation.
- Figure S30.** Representative dose-response curve for the treatment of HMLER-shEcad mammospheres with **3** after 5 days incubation.
- Figure S31.** Representative dose-response curve for the treatment of HMLER-shEcad mammospheres with **4** after 5 days incubation.
- Figure S32.** Representative dose-response curve for the treatment of HMLER-shEcad mammospheres with **5** after 5 days incubation.
- Figure S33.** Representative dose-response curve for the treatment of HMLER-shEcad mammospheres with **L**<sup>2</sup> after 5 days incubation.
- Figure S34.** Representative dose-response curve for the treatment of HMLER-shEcad mammospheres with **L**<sup>3</sup> after 5 days incubation.
- Figure S35.** Normalised ROS activity in untreated HMLER-shEcad cells (control) and HMLER-shEcad cells treated with **2** ( $2 \times \text{IC}_{50}$  value for 0.5, 1, 3, 6, 16, and 24 h). Error bars represent standard deviations and Student *t* test, \* = *p* < 0.05.
- Figure S36.** Normalised ROS activity in untreated HMLER-shEcad cells (control) and HMLER-shEcad cells treated with **3** ( $2 \times \text{IC}_{50}$  value for 0.5, 1, 3, 6, 16, and 24 h). Error bars represent standard deviations and Student *t* test, \* = *p* < 0.05.
- Figure S37.** Normalised ROS activity in untreated HMLER-shEcad cells (control) and HMLER-shEcad cells treated with H<sub>2</sub>O<sub>2</sub> (150 µM for 0.5, 1, 3, 6, 16, and 24 h). Error bars represent standard deviations and Student *t* test, \* = *p* < 0.05.

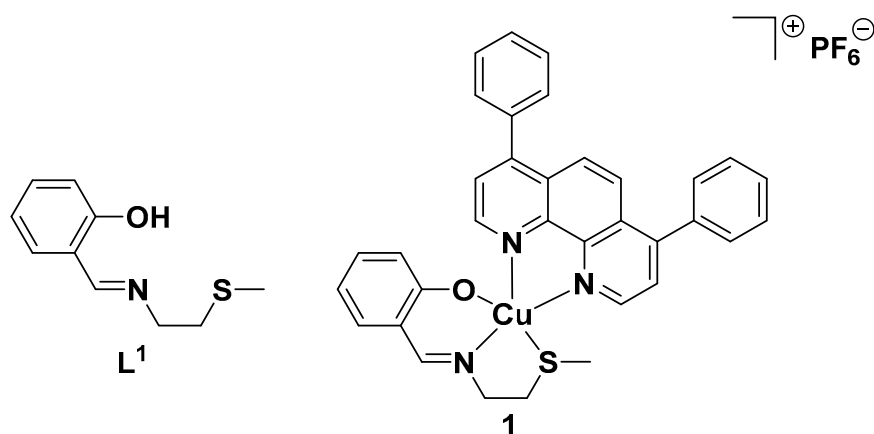

**Figure S1.** Chemical structures of the Schiff base ligand **L**<sup>1</sup> and the copper(II) complex **1** containing **L**<sup>1</sup> and 4,7-diphenyl-1,10-phenanthroline. The copper(II) complex **1** was previously shown by our group to kill breast cancer stem cells (CSCs) via cytotoxic and immunogenic mechanisms.

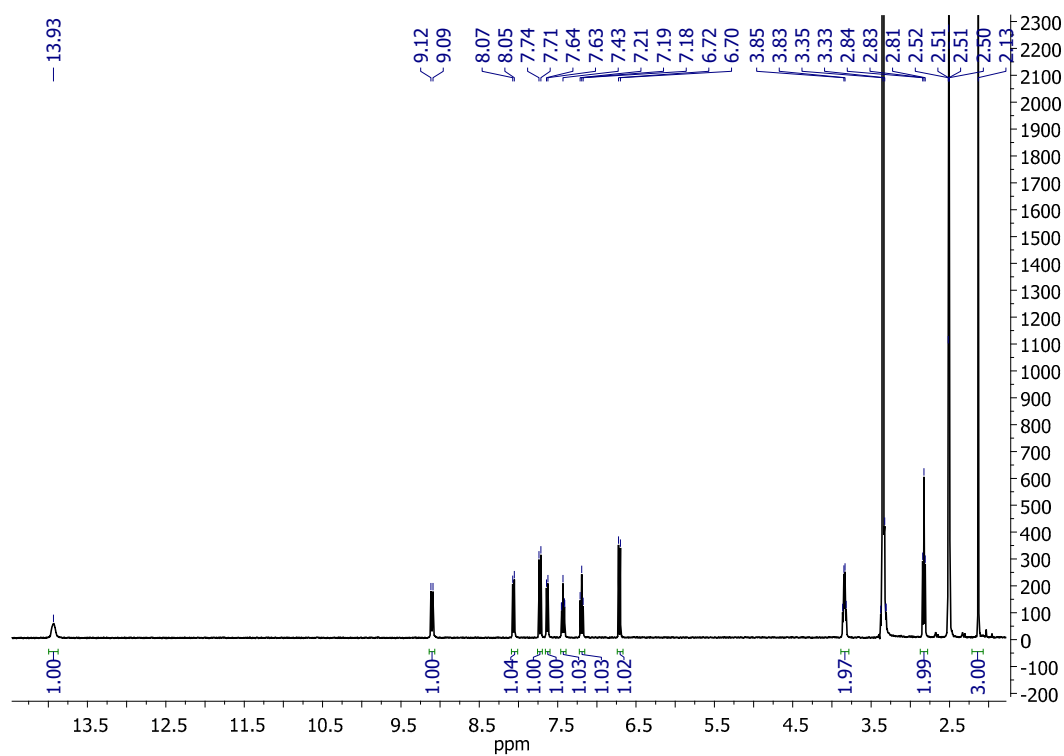Figure S2. <sup>1</sup>H NMR spectrum of L<sup>2</sup> in DMSO-d<sub>6</sub>.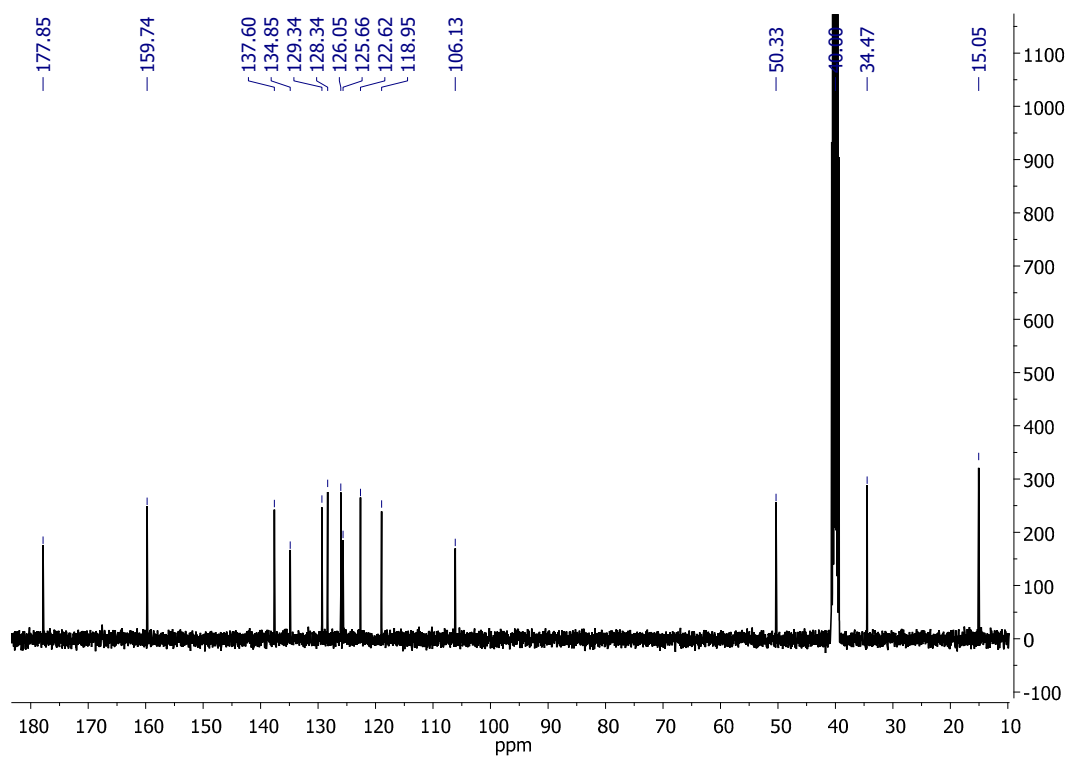Figure S3. <sup>13</sup>C{<sup>1</sup>H} NMR spectrum of L<sup>2</sup> in DMSO-d<sub>6</sub>.

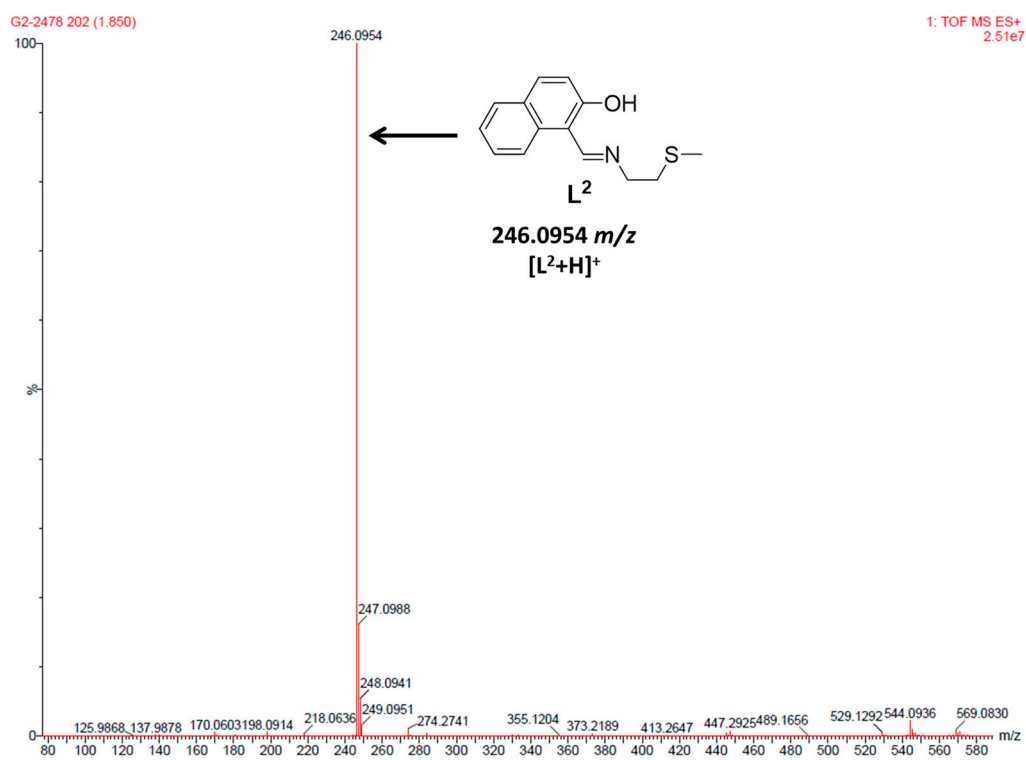

Figure S4. HR-ESI mass spectrum (positive mode) of  $L^2$ .

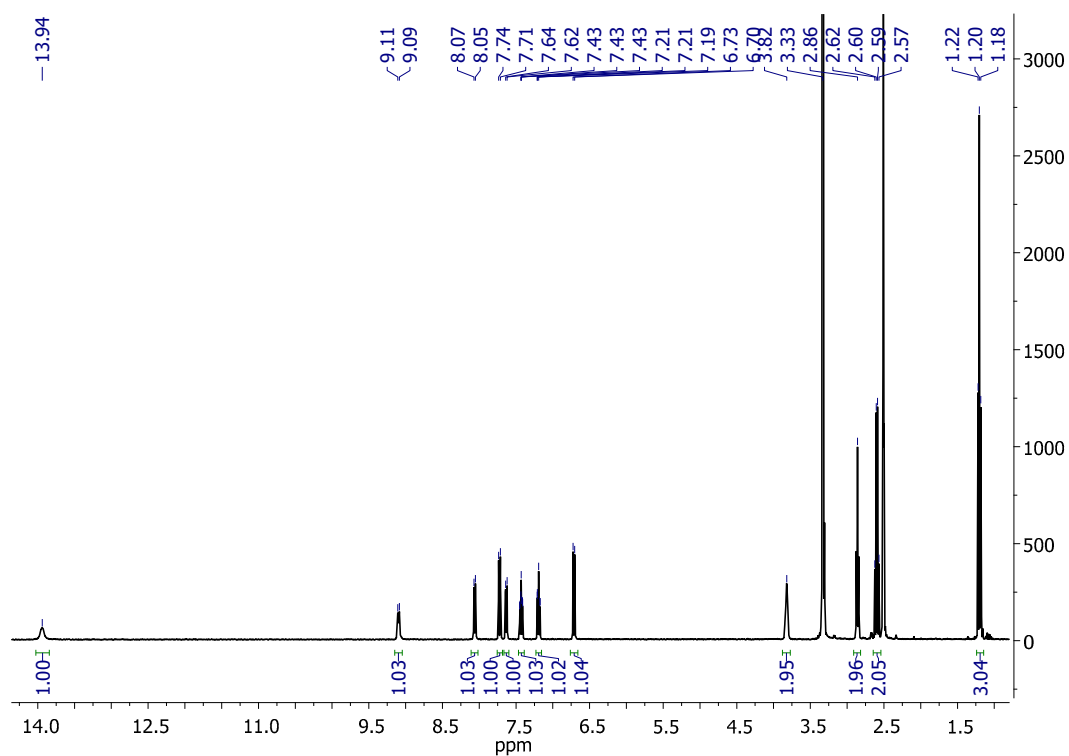Figure S5. <sup>1</sup>H NMR spectrum of L<sup>3</sup> in DMSO-d<sub>6</sub>.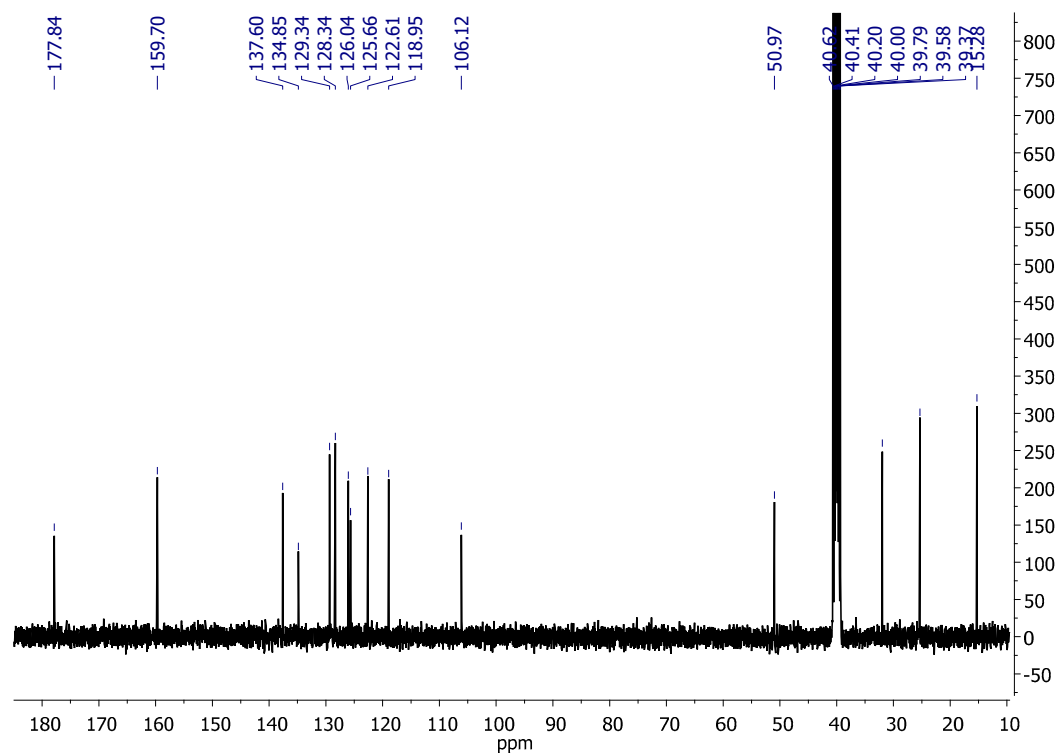Figure S6. <sup>13</sup>C{<sup>1</sup>H} NMR spectrum of L<sup>3</sup> in DMSO-d<sub>6</sub>.

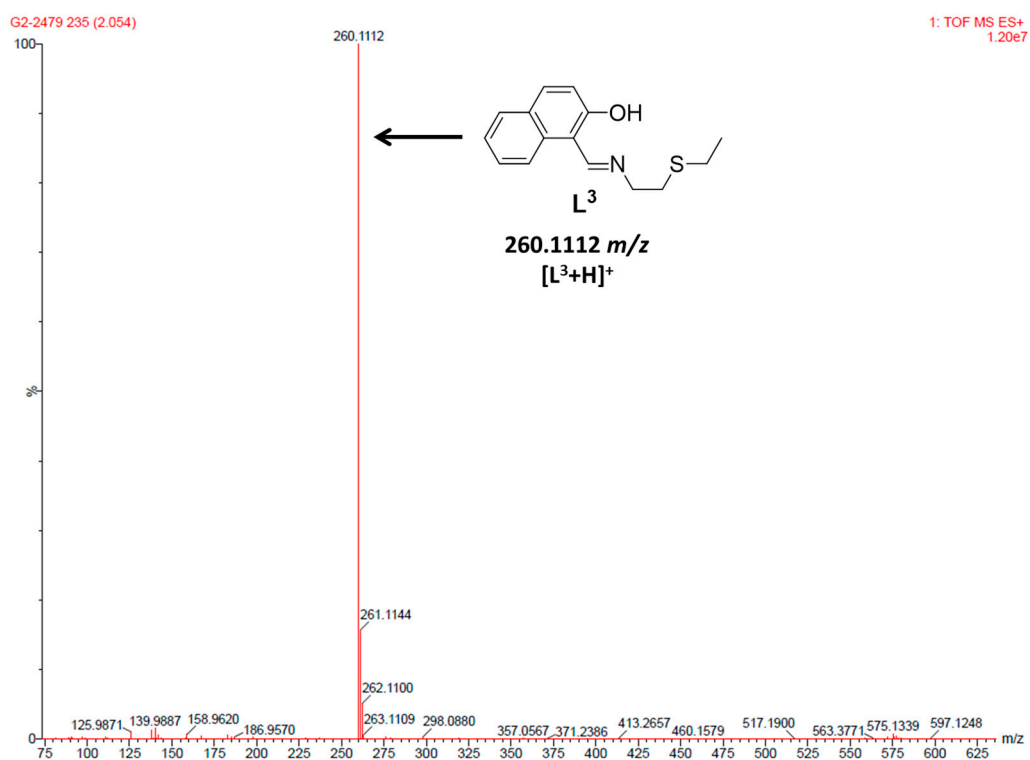

**Figure S7.** HR-ESI mass spectrum (positive mode) of L<sup>3</sup>.

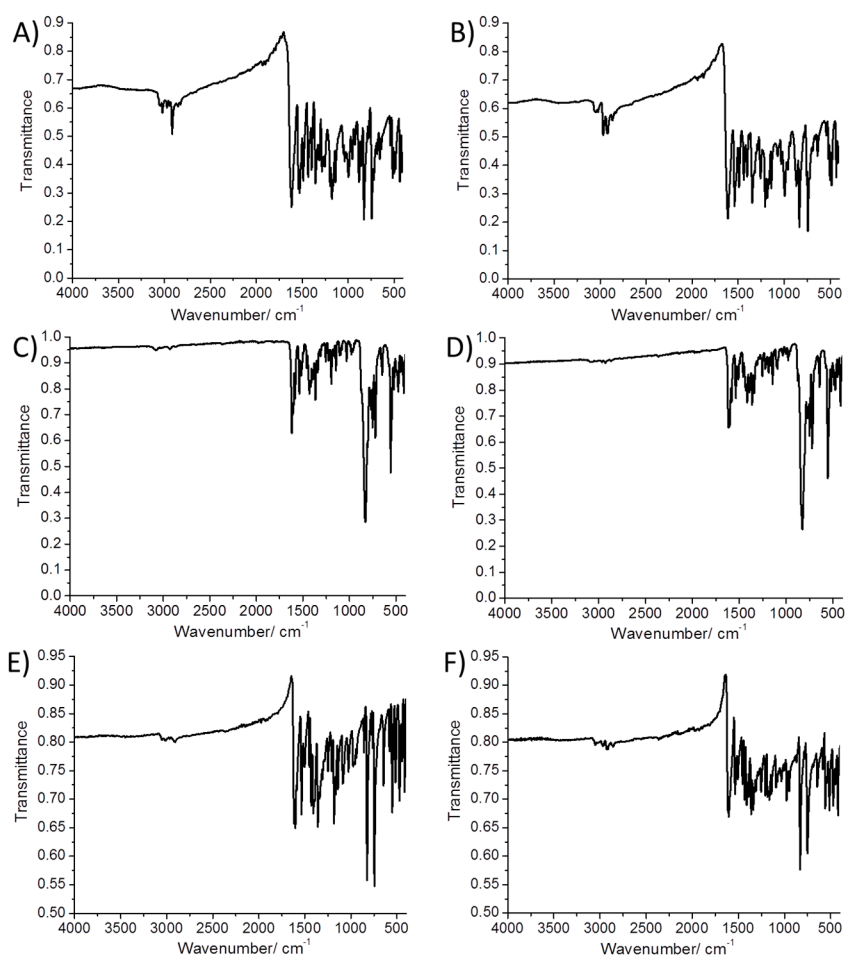

**Figure S8.** IR spectrum of (A) L<sup>2</sup>, (B) L<sup>3</sup>, (C) 2, (D) 3, (E) 4, and (F) 5 in the solid form.

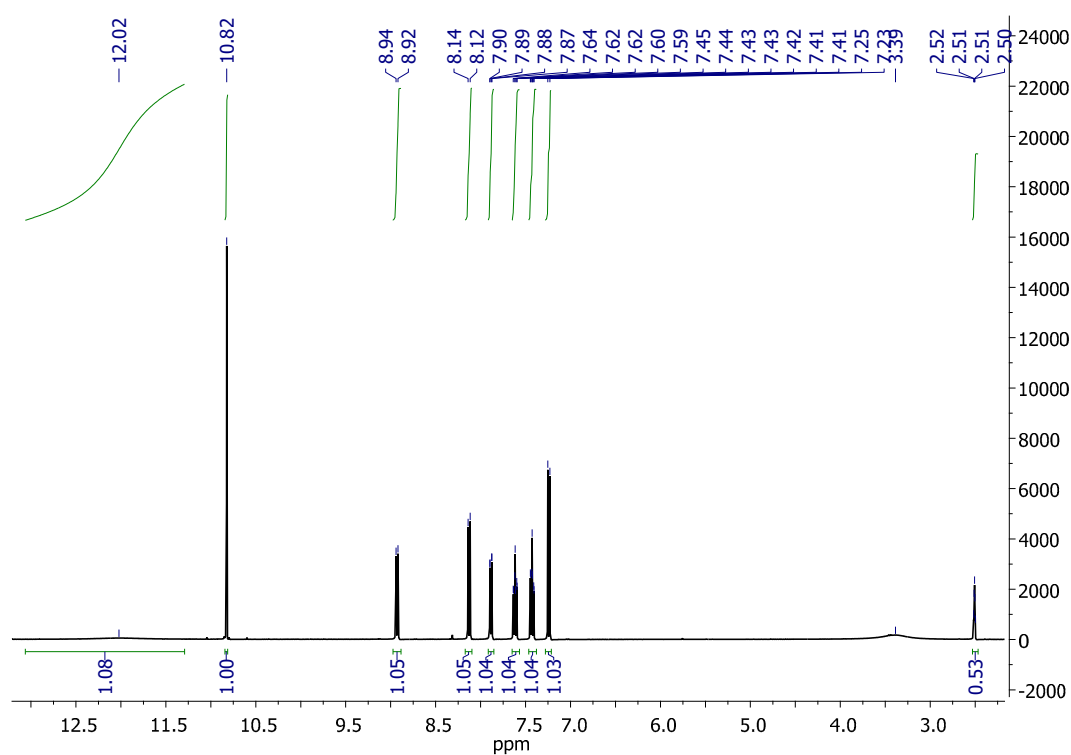

**Figure S9.** <sup>1</sup>H NMR spectrum of 2-hydroxy-1-naphthaldehyde in DMSO-*d*<sub>6</sub>.

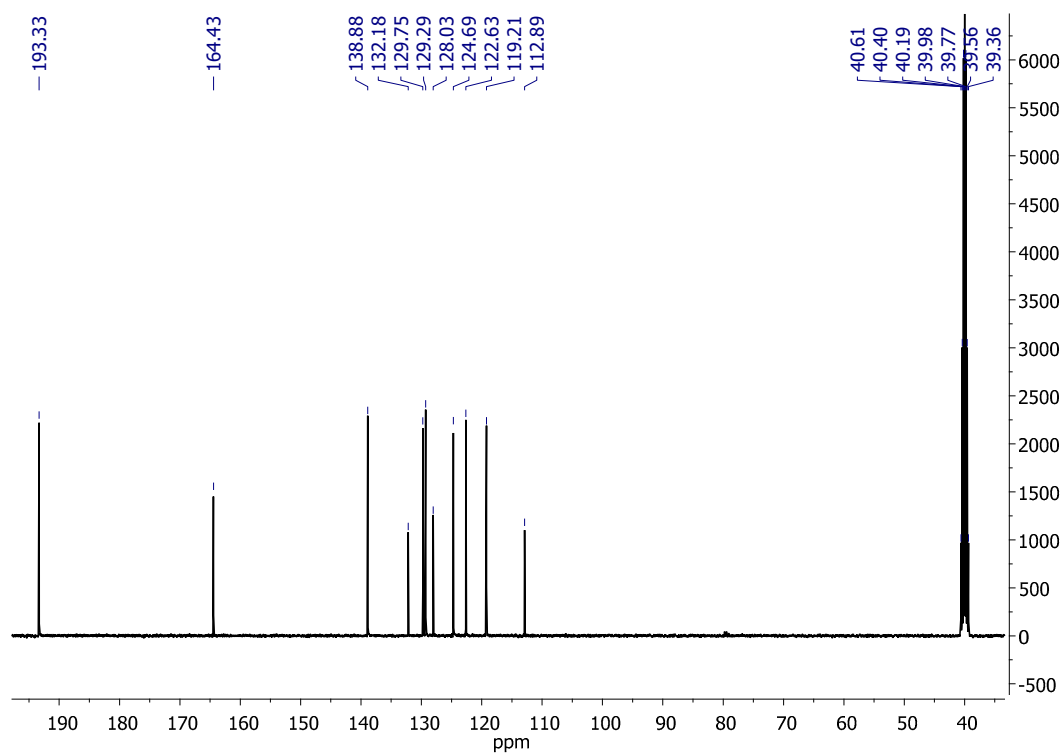

**Figure S10.** <sup>13</sup>C{<sup>1</sup>H} NMR spectrum of 2-hydroxy-1-naphthaldehyde in DMSO-d<sub>6</sub>.

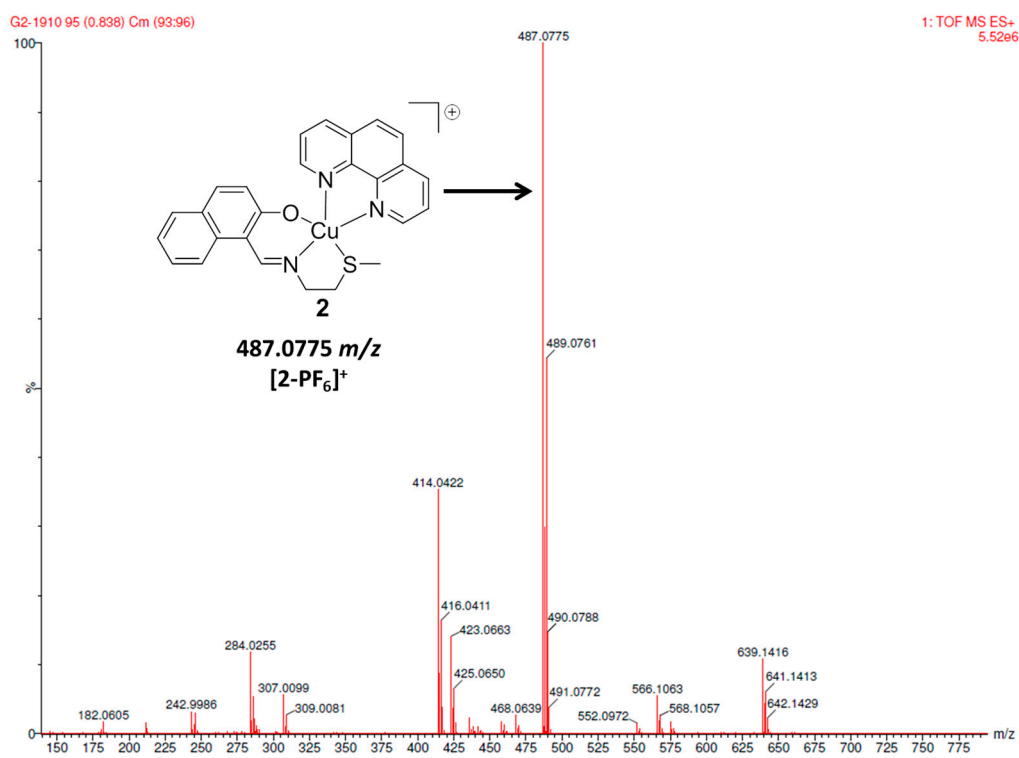



**Figure S11.** HR-ESI mass spectrum (positive mode) of **2**.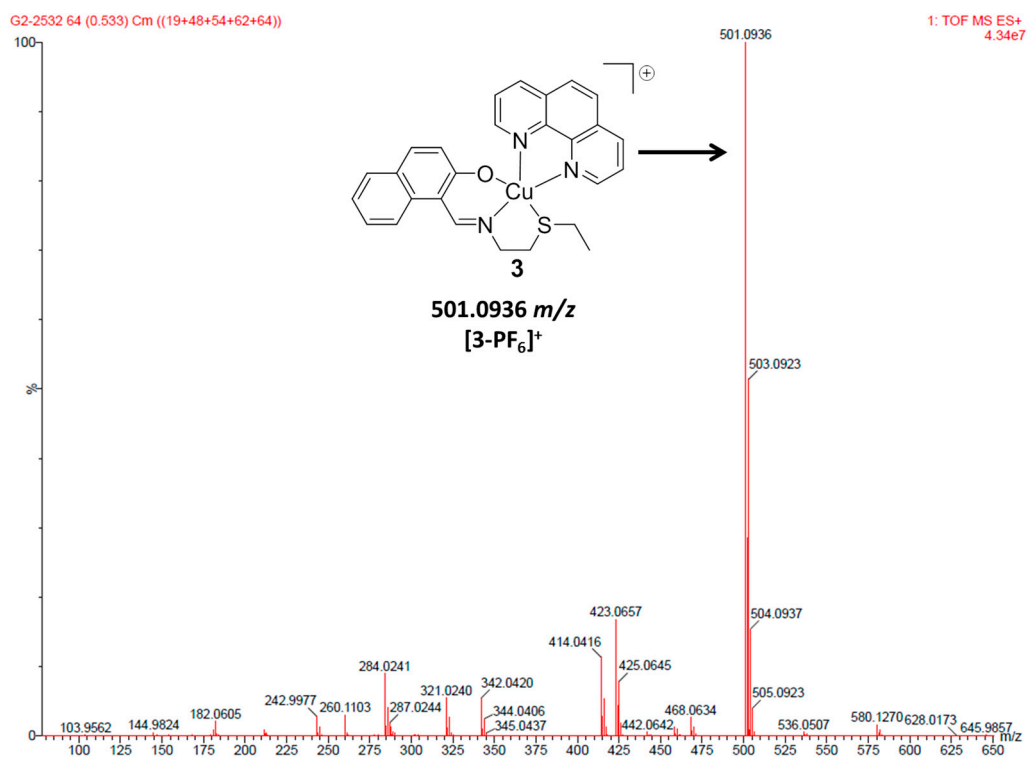**Figure S12.** HR-ESI mass spectrum (positive mode) of **3**.

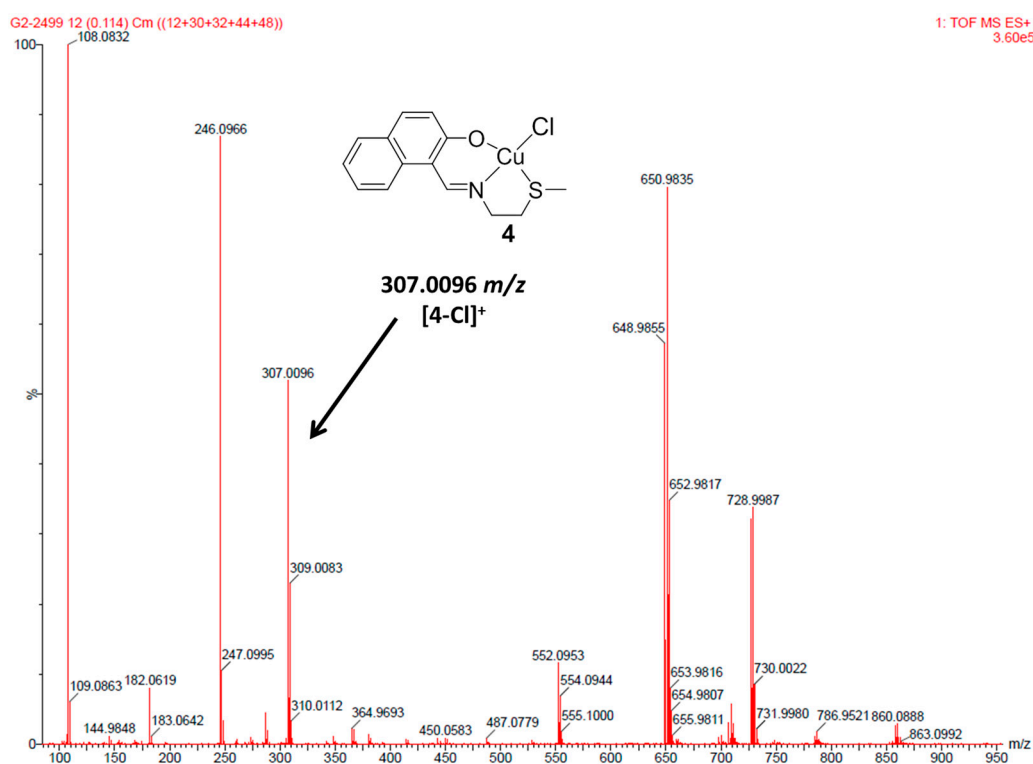Figure S13. HR-ESI mass spectrum (positive mode) of **4**.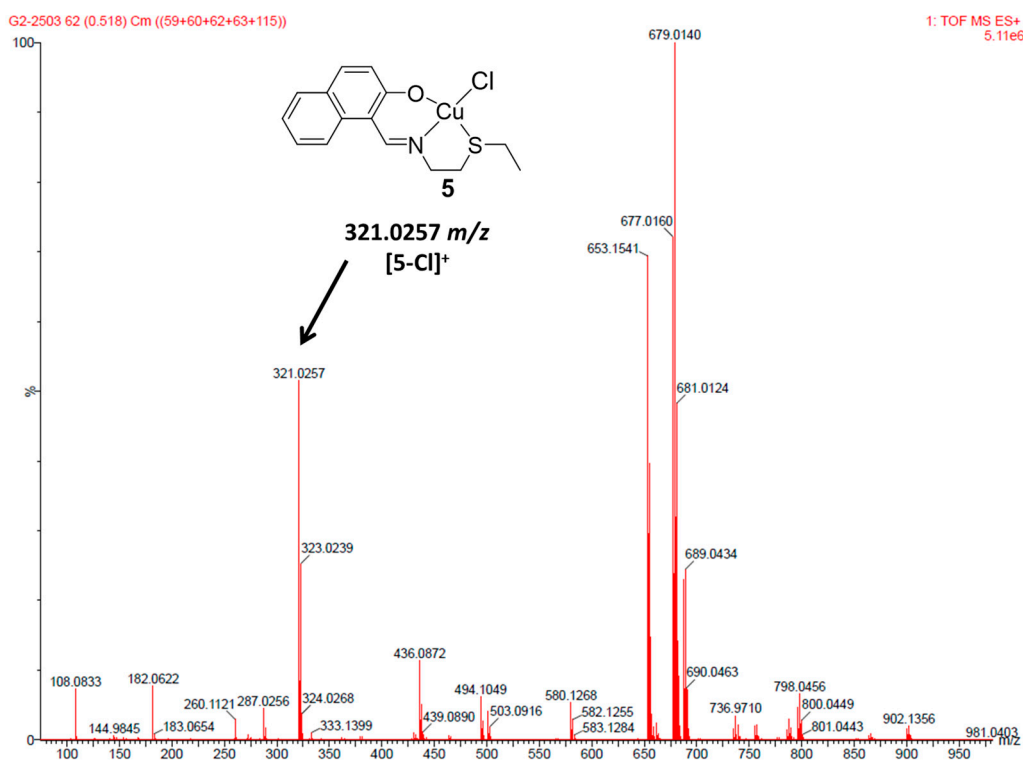Figure S14. HR-ESI mass spectrum (positive mode) of **5**.

**Table S1.** Crystallographic data for **2** and **3**.

| Metal complex                                                                 | <b>2</b>                                                            | <b>3</b>                                                            |
|-------------------------------------------------------------------------------|---------------------------------------------------------------------|---------------------------------------------------------------------|
| CCDC No.                                                                      | 2046680                                                             | 2046679                                                             |
| formula                                                                       | C <sub>26</sub> H <sub>22</sub> N <sub>3</sub> OF <sub>6</sub> PSCu | C <sub>27</sub> H <sub>24</sub> CuF <sub>6</sub> N <sub>3</sub> OPS |
| <i>Fw</i>                                                                     | 633.03                                                              | 647.06                                                              |
| Crystal system                                                                | monoclinic                                                          | monoclinic                                                          |
| Space group                                                                   | <i>P2<sub>1</sub>/n</i>                                             | <i>P2<sub>1</sub>/c</i>                                             |
| <i>a</i> , Å                                                                  | 13.926(3)                                                           | 8.471(4)                                                            |
| <i>b</i> , Å                                                                  | 13.293(3)                                                           | 17.550(9)                                                           |
| <i>c</i> , Å                                                                  | 14.251(3)                                                           | 18.443(9)                                                           |
| $\alpha$ , deg.                                                               | 90                                                                  | 90                                                                  |
| $\beta$ , deg.                                                                | 97.527(4)                                                           | 99.605(11)                                                          |
| $\gamma$ , deg.                                                               | 90                                                                  | 90                                                                  |
| <i>V</i> , Å <sup>3</sup>                                                     | 2615.3(11)                                                          | 2703(2)                                                             |
| <i>Z</i>                                                                      | 4                                                                   | 4                                                                   |
| $\rho_{\text{calc}}$ /cm <sup>3</sup>                                         | 1.608                                                               | 1.590                                                               |
| $2\theta$ / deg.                                                              | 3.846 to 51.994                                                     | 3.226 to 51.998                                                     |
| Reflections collected                                                         | 19911                                                               | 20967                                                               |
| Independent reflections                                                       | 5119                                                                | 5307                                                                |
| Goodness-of-fit on <i>F</i> <sup>2</sup>                                      | 0.996                                                               | 0.886                                                               |
| <i>R</i> <sub>1</sub> , w <i>R</i> <sub>2</sub> [ <i>I</i> ≥ 2σ ( <i>I</i> )] | 0.0545, 0.1193                                                      | 0.0636, 0.1198                                                      |
| <i>R</i> <sub>1</sub> , w <i>R</i> <sub>2</sub> [all data]                    | 0.0788, 0.1282                                                      | 0.1315, 0.1426                                                      |
| Largest diff. peak/hole / e Å <sup>-3</sup>                                   | 0.59/-0.41                                                          | 0.42/-0.40                                                          |

**Table S2.** Selected bond lengths (Å) and angles (°) for **2**.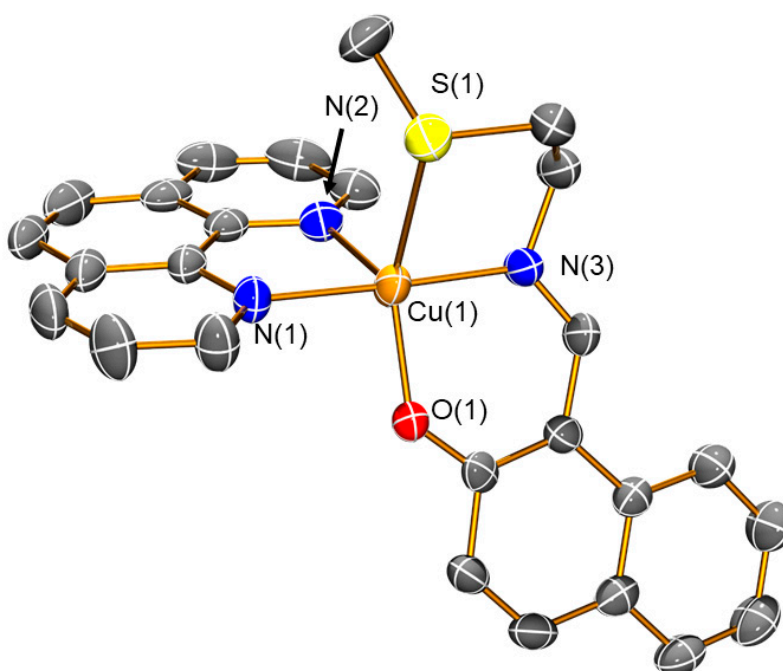

|                 |            |                 |            |
|-----------------|------------|-----------------|------------|
| Cu(1)-S(1)      | 2.5220(11) | Cu(1)-N(2)      | 2.152(3)   |
| Cu(1)-O(1)      | 1.908(2)   | Cu(1)-N(3)      | 1.933(3)   |
| Cu(1)-N(1)      | 2.007(3)   |                 |            |
| O(1)-Cu(1)-S(1) | 131.68(8)  | N(2)-Cu(1)-S(1) | 102.30(8)  |
| O(1)-Cu(1)-N(1) | 89.49(10)  | N(3)-Cu(1)-S(1) | 83.50(9)   |
| O(1)-Cu(1)-N(2) | 125.71(10) | N(3)-Cu(1)-N(1) | 177.78(12) |
| O(1)-Cu(1)-N(3) | 92.59(11)  | N(3)-Cu(1)-N(2) | 99.72(12)  |
| N(1)-Cu(1)-S(1) | 94.53(9)   | N(1)-Cu(1)-N(2) | 79.67(11)  |

**Table S3.** Selected bond lengths (Å) and angles (°) for **3**.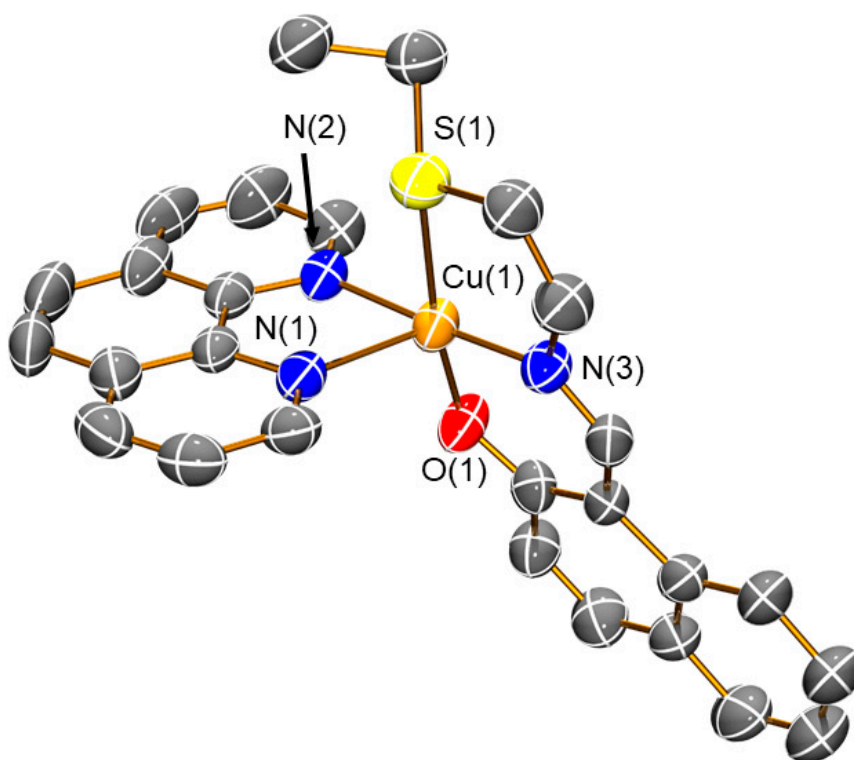

|                  |            |                  |           |
|------------------|------------|------------------|-----------|
| Cu(1)-S(1A)      | 2.50(2)    | Cu(1)-N(1)       | 2.220(4)  |
| Cu(1)-S(1B)      | 2.50(2)    | Cu(1)-N(2)       | 2.000(4)  |
| Cu(1)-O(1)       | 1.916(3)   | Cu(1)-N(3)       | 1.915(4)  |
| O(1)-Cu(1)-N(1)  | 108.4(2)   | N(2)-Cu(1)-S(1A) | 93.3(4)   |
| O(1)-Cu(1)-N(2)  | 90.4(2)    | N(2)-Cu(1)-S(1B) | 91.15(13) |
| O(1)-Cu(1)-S(1A) | 172.6(4)   | N(3)-Cu(1)-O(1)  | 93.4(2)   |
| O(1)-Cu(1)-S(1B) | 144.42(13) | N(3)-Cu(1)-N(1)  | 100.4(2)  |
| N(1)-Cu(1)-S(1A) | 78.6(4)    | N(3)-Cu(1)-N(2)  | 176.2(2)  |
| N(1)-Cu(1)-S(1B) | 106.73(11) | N(3)-Cu(1)-S(1A) | 82.9(4)   |
| N(2)-Cu(1)-N(1)  | 78.9(2)    | N(3)-Cu(1)-S(1B) | 85.44(13) |

**Table S4.** Experimentally determined LogP values for 2-5.

| Metal complex | LogP             |
|---------------|------------------|
| 2             | $-0.39 \pm 0.06$ |
| 3             | $-0.63 \pm 0.03$ |
| 4             | $0.02 \pm 0.04$  |
| 5             | $0.34 \pm 0.03$  |

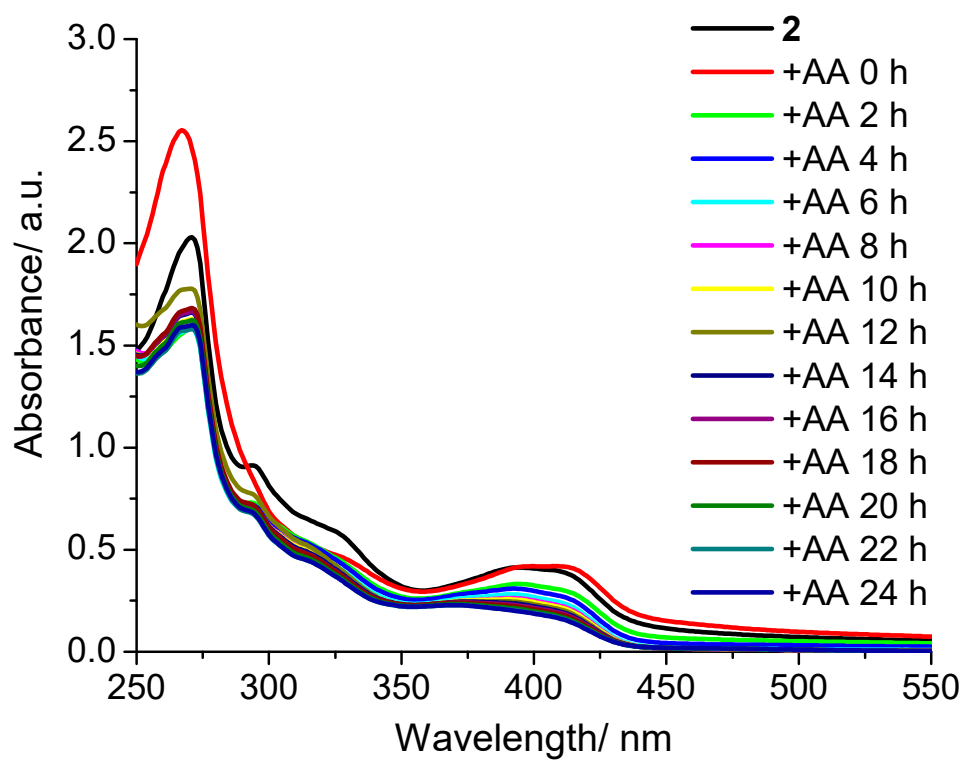**Figure S15.** UV-Vis spectrum of 2 (50 μM) in the presence of ascorbic acid (500 μM) in PBS:DMSO (200:1) over the course of 24 h at 37 °C.

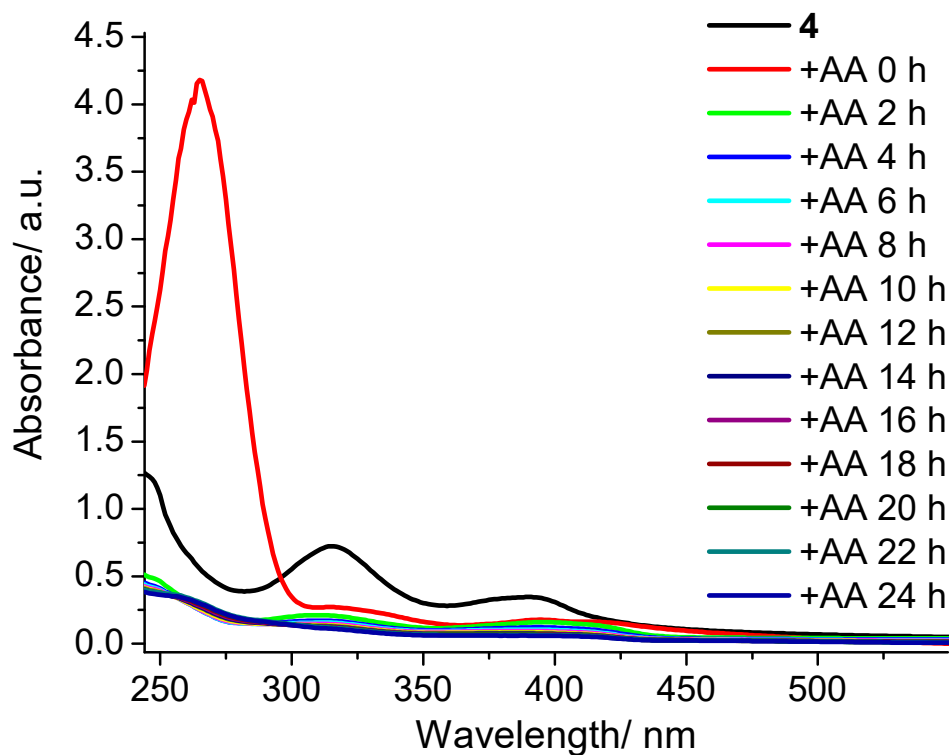

**Figure S16.** UV-Vis spectrum of **4** (50 μM) in the presence of ascorbic acid (500 μM) in PBS:DMSO (200:1) over the course of 24 h at 37 °C.

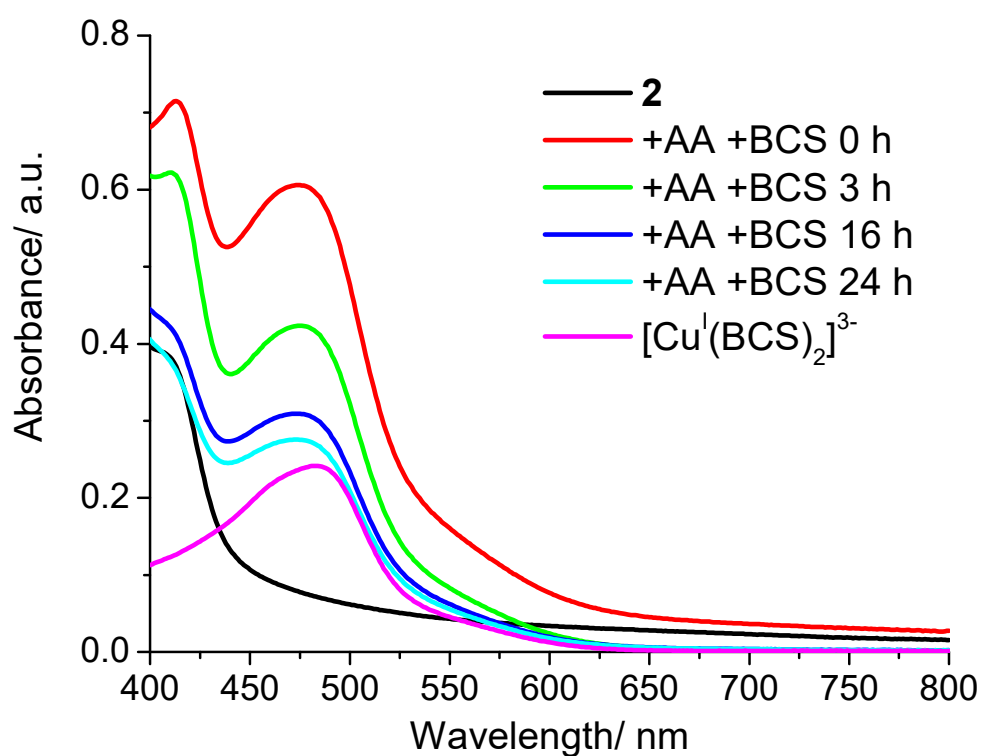

**Figure S17.** UV-Vis spectrum of **2** (50  $\mu$ M) in the presence of ascorbic acid (500  $\mu$ M) and bathocuproine disulfonate, BCS (100  $\mu$ M) in PBS:DMSO (200:1) over the course of 24 h at 37  $^{\circ}$ C.

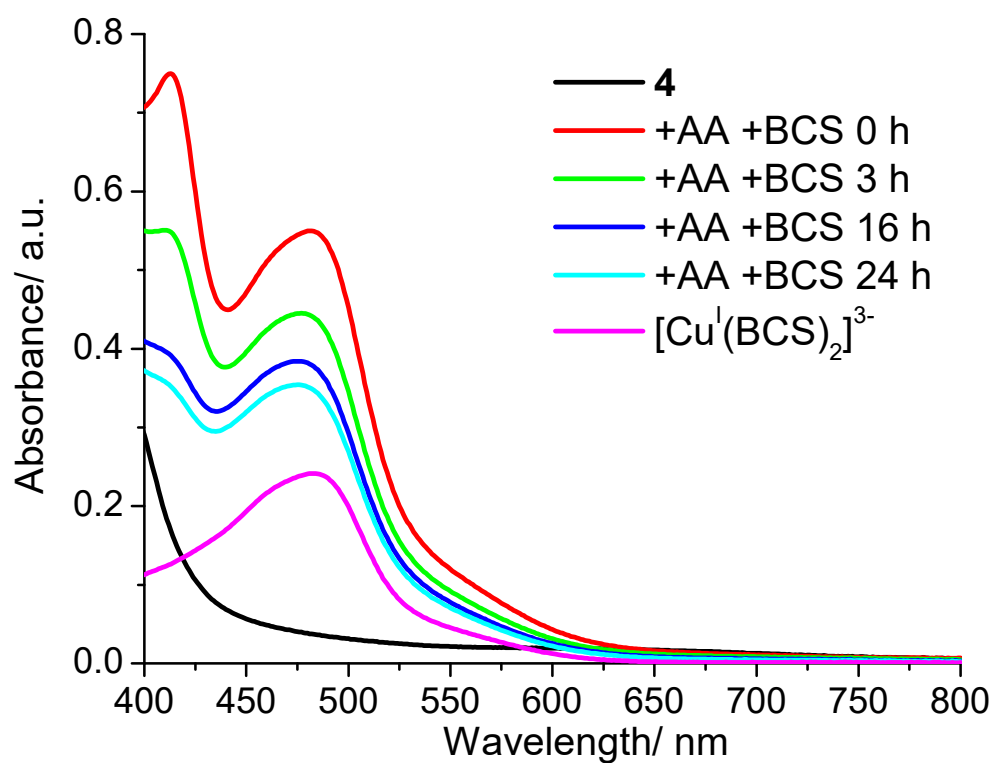

**Figure S18.** UV-Vis spectrum of **4** (50  $\mu$ M) in the presence of ascorbic acid (500  $\mu$ M) and bathocuproine disulfonate, BCS (100  $\mu$ M) in PBS:DMSO (200:1) over the course of 24 h at 37  $^{\circ}$ C.

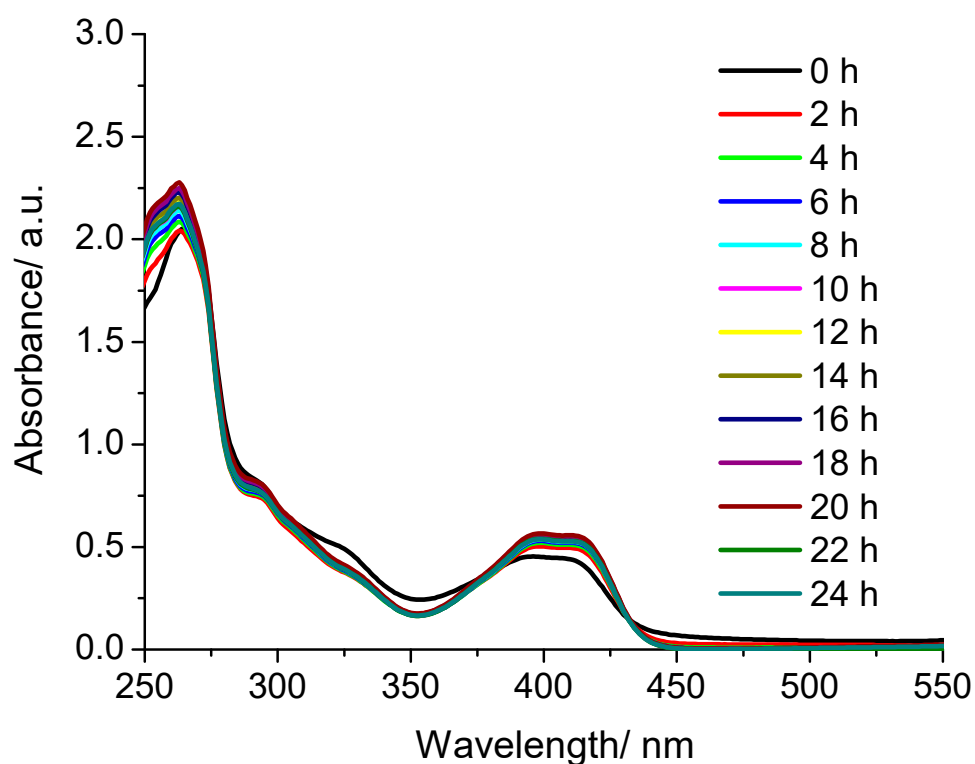



**Figure S19.** UV-Vis spectrum of **2** (50  $\mu$ M) in mammary epithelial cell growth medium (MEGM):DMSO (200:1) over the course of 24 h at 37  $^{\circ}$ C.

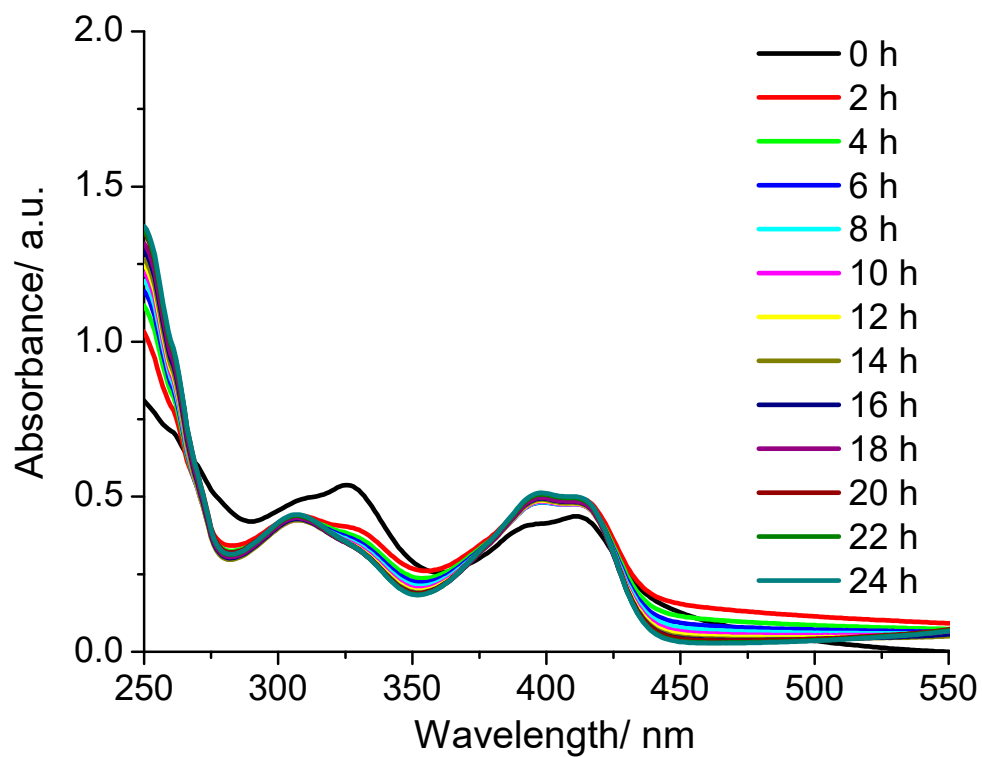

**Figure S20.** UV-Vis spectrum of **4** (50  $\mu$ M) in mammary epithelial cell growth medium (MEGM):DMSO (200:1) over the course of 24 h at 37  $^{\circ}$ C.

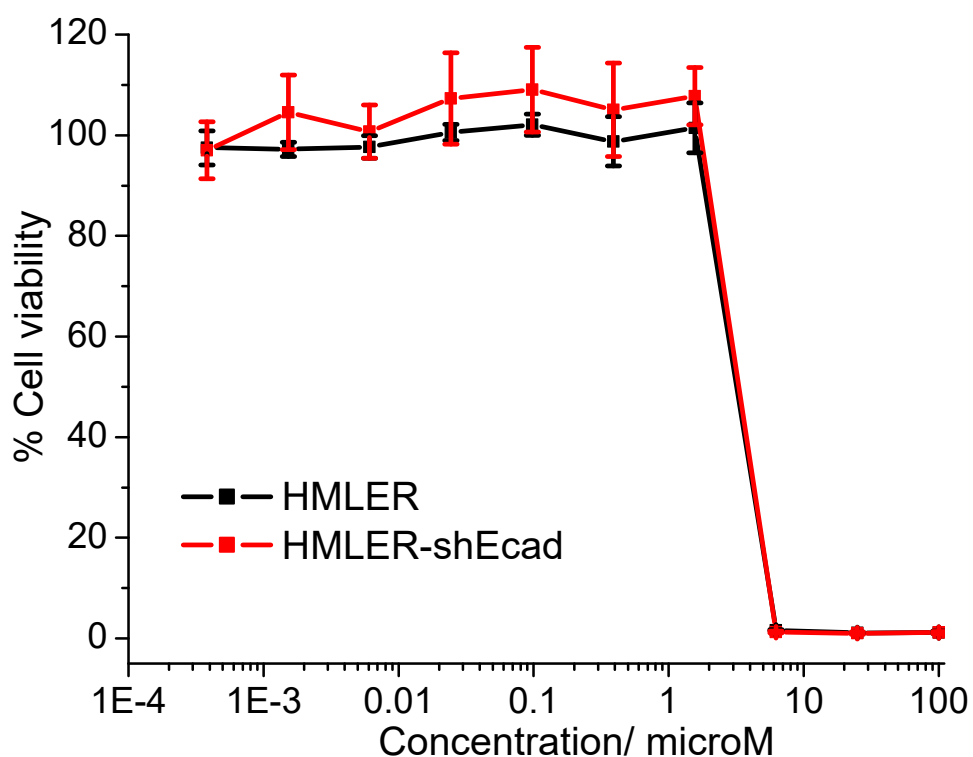

Figure S21. Representative dose-response curves for the treatment of HMLER and HMLER-shEcad cells with 2.

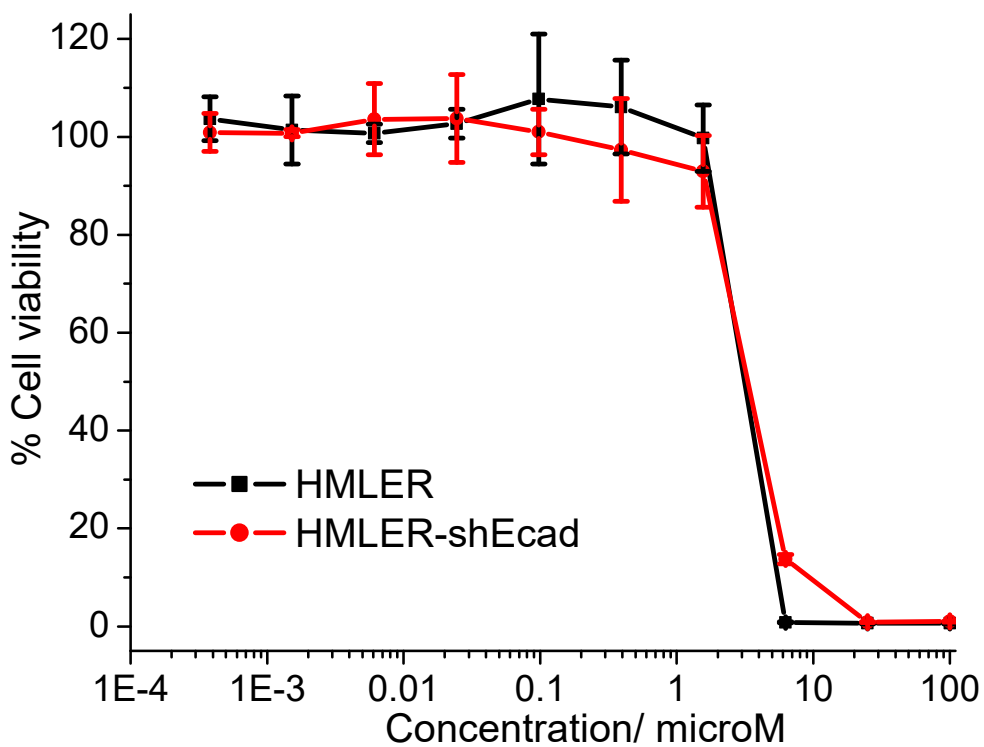

Figure S22. Representative dose-response curves for the treatment of HMLER and HMLER-shEcad cells with 3.

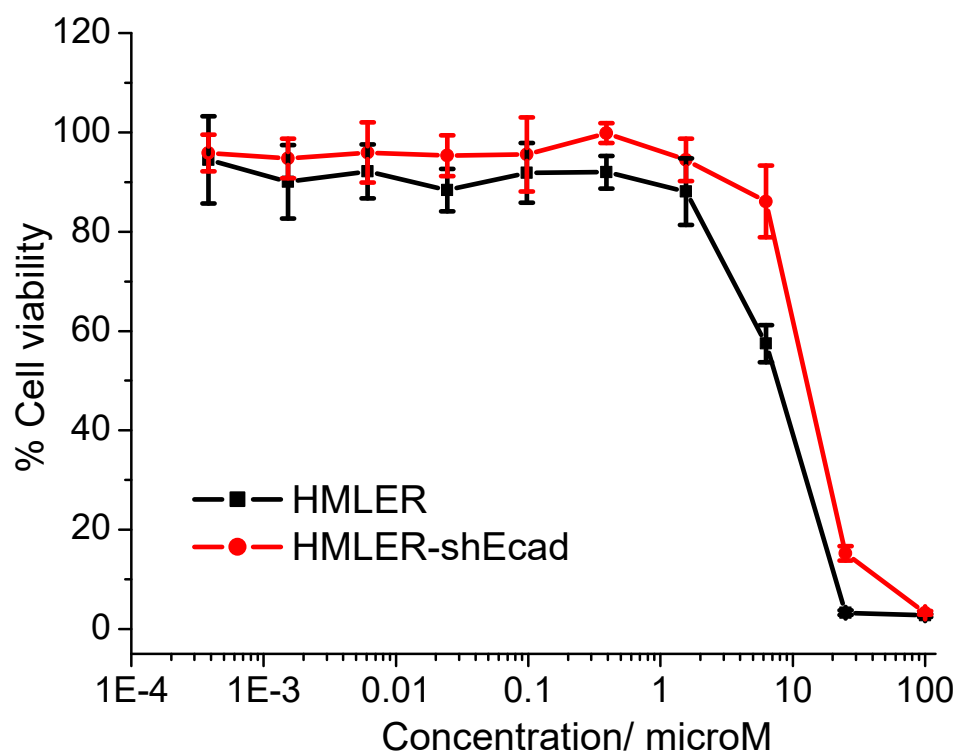

Figure S23. Representative dose-response curves for the treatment of HMLER and HMLER-shEcad cells with 4.

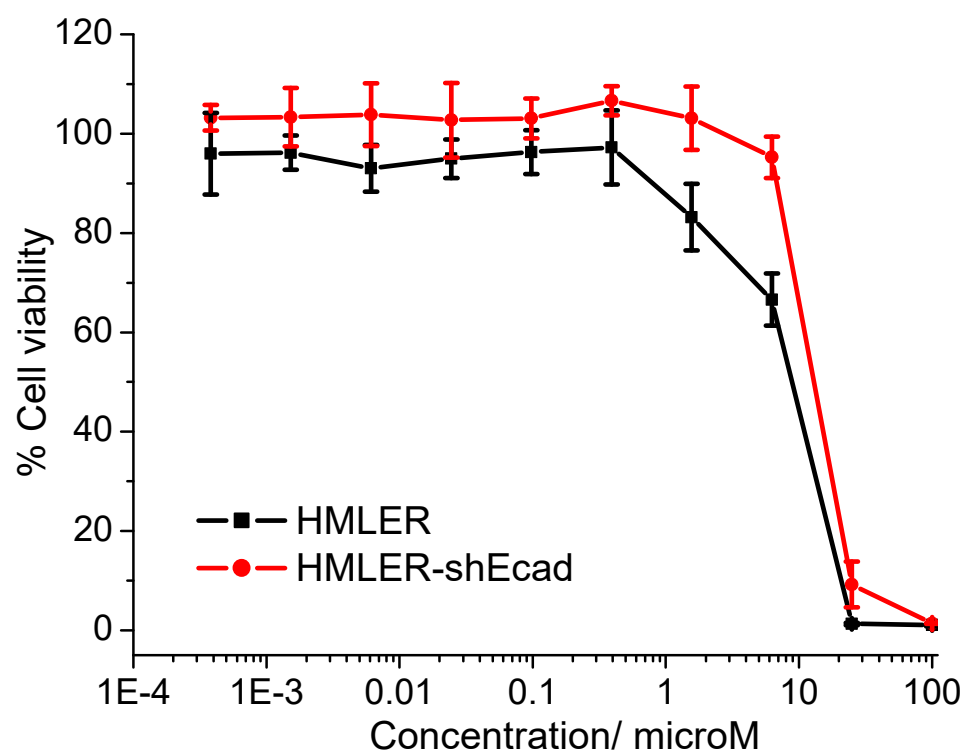

Figure S24. Representative dose-response curves for the treatment of HMLER and HMLER-shEcad cells with 5.

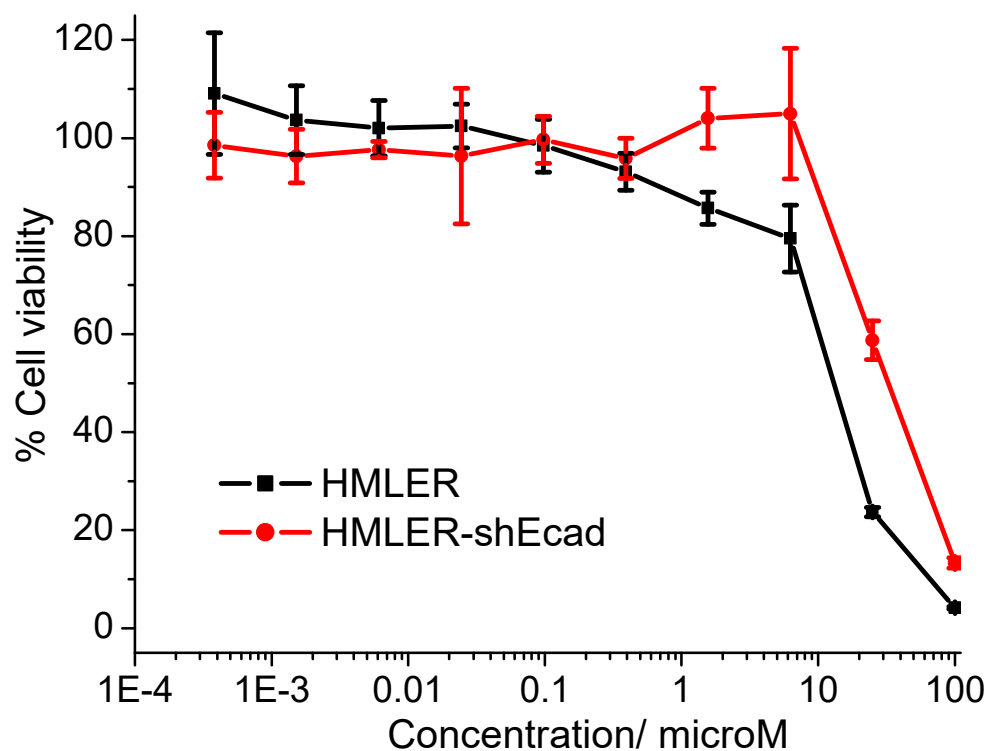

Figure S25. Representative dose-response curves for the treatment of HMLER and HMLER-shEcad cells with L<sup>2</sup>.

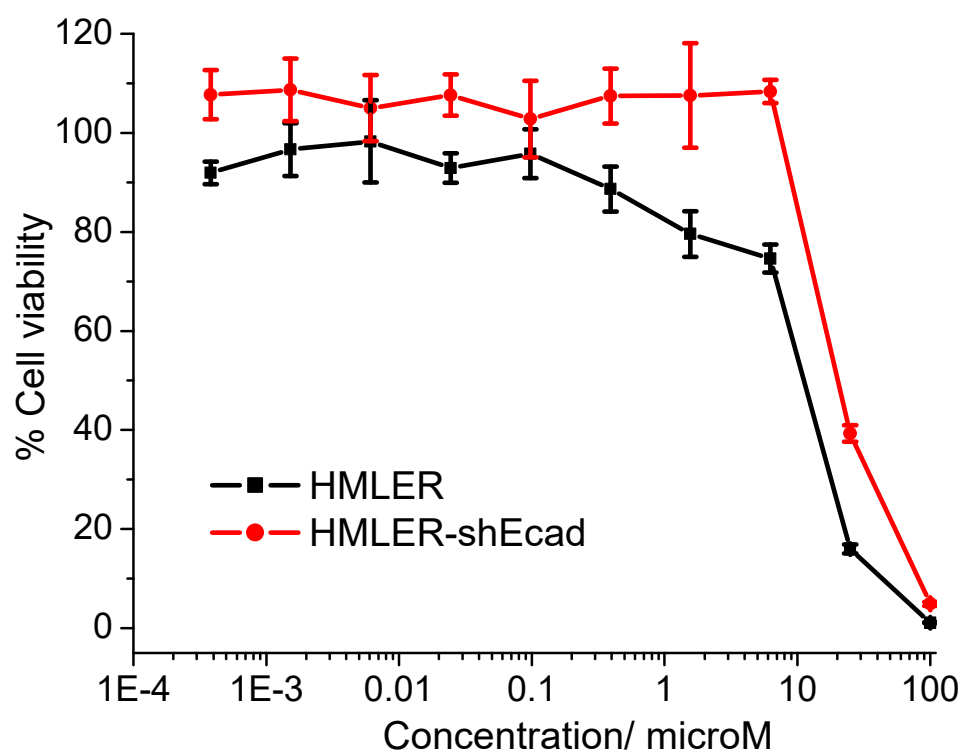

Figure S26. Representative dose-response curves for the treatment of HMLER and HMLER-shEcad cells with L<sup>3</sup>.

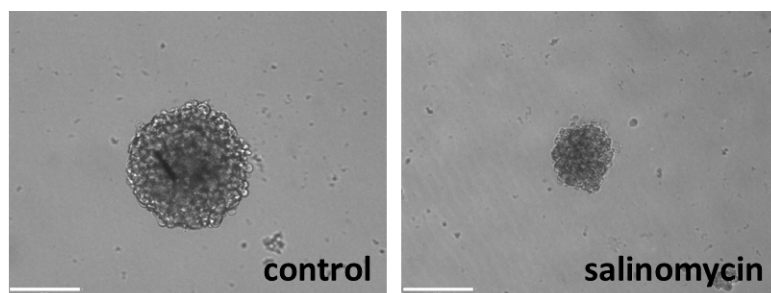

**Figure S27.** Bright-field images (taken using an inverted microscope) representative of untreated HMLER-shEcad mammospheres and those treated with salinomycin for 5 days at its IC<sub>20</sub> values. Scale bar = 160  $\mu$ m.

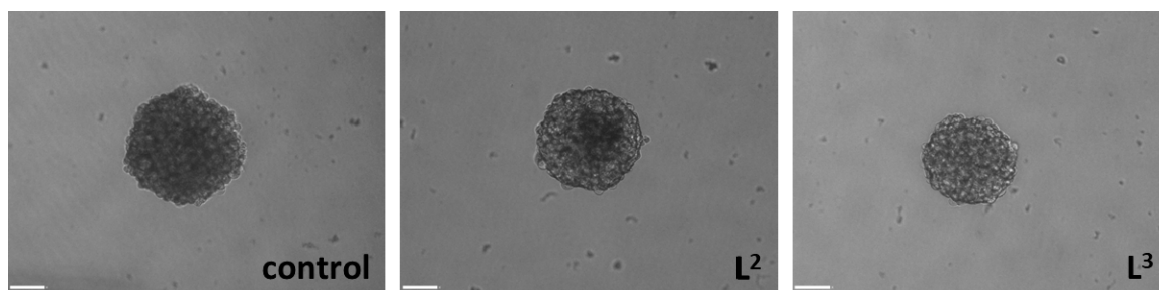

**Figure S28.** Bright-field images (taken using an inverted microscope) representative of untreated HMLER-shEcad mammospheres and those treated with L<sup>2</sup> or L<sup>3</sup> for 5 days at their respective IC<sub>20</sub> values. Scale bar = 100  $\mu$ m.

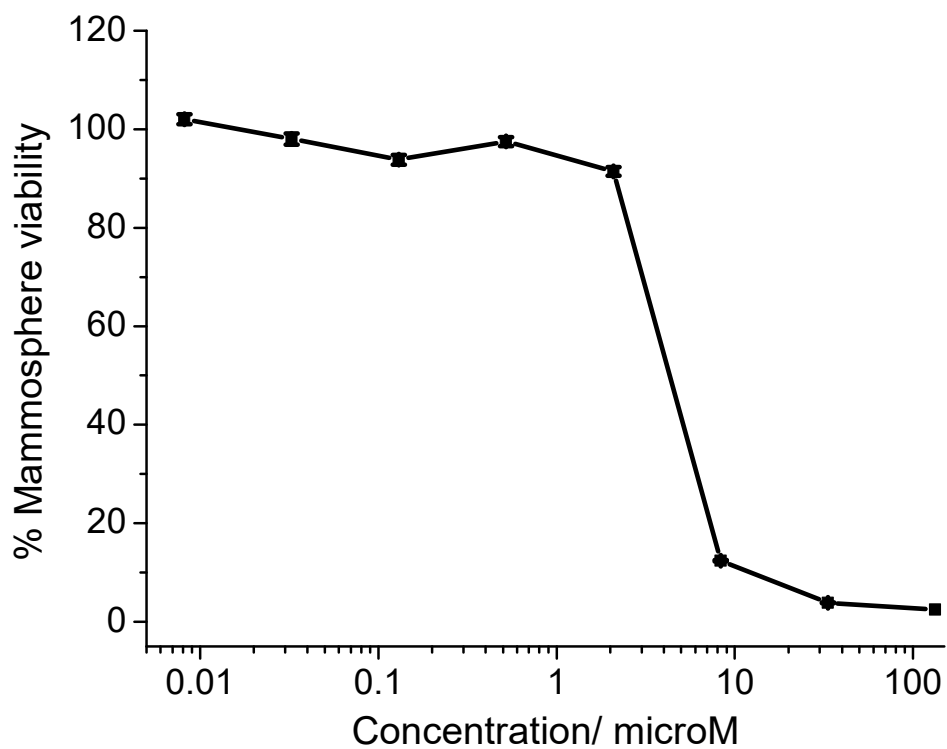

**Figure S29.** Representative dose-response curve for the treatment of HMLER-shEcad mammospheres with 2 after 5 days incubation.

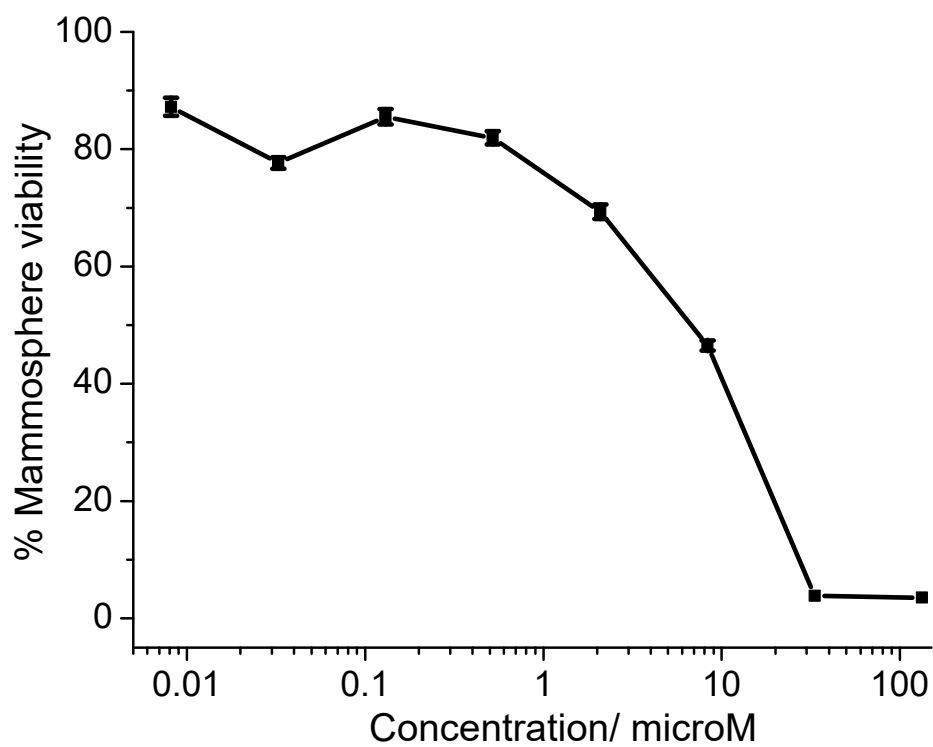

**Figure S30.** Representative dose-response curve for the treatment of HMLER-shEcad mammospheres with **3** after 5 days incubation.

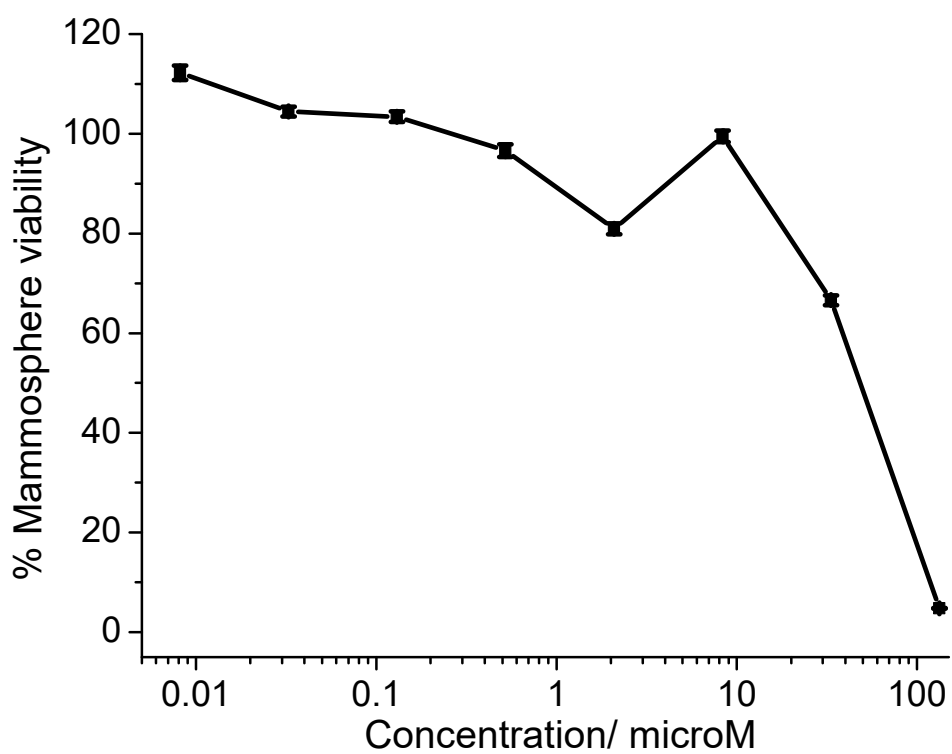

**Figure S31.** Representative dose-response curve for the treatment of HMLER-shEcad mammospheres with **4** after 5 days incubation.

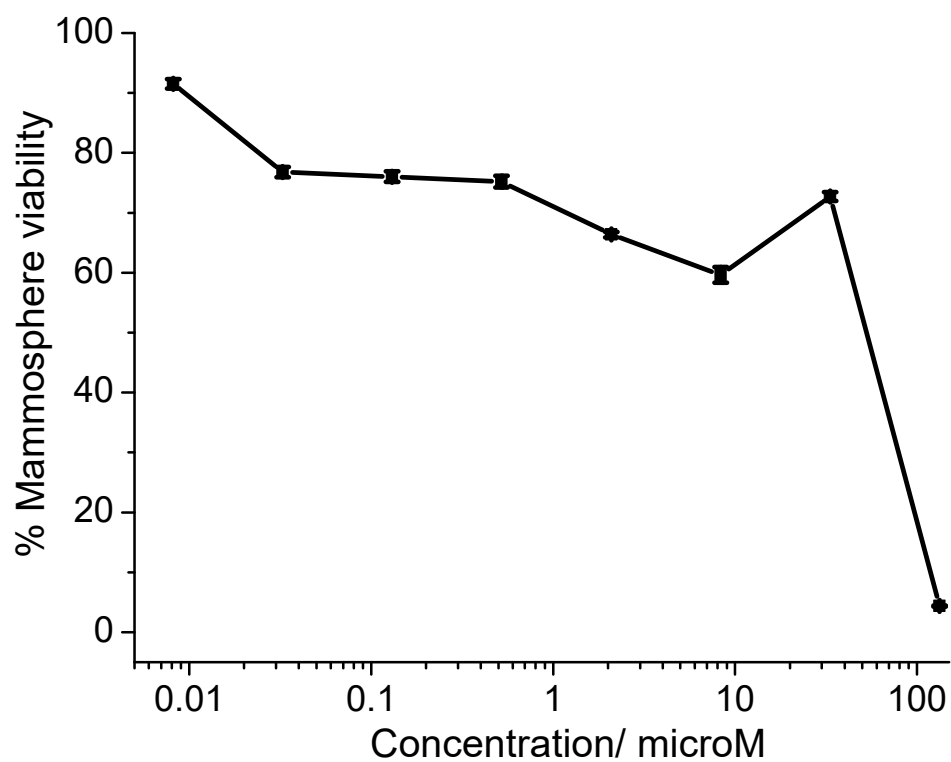

**Figure S32.** Representative dose-response curve for the treatment of HMLER-shEcad mammospheres with **5** after 5 days incubation.

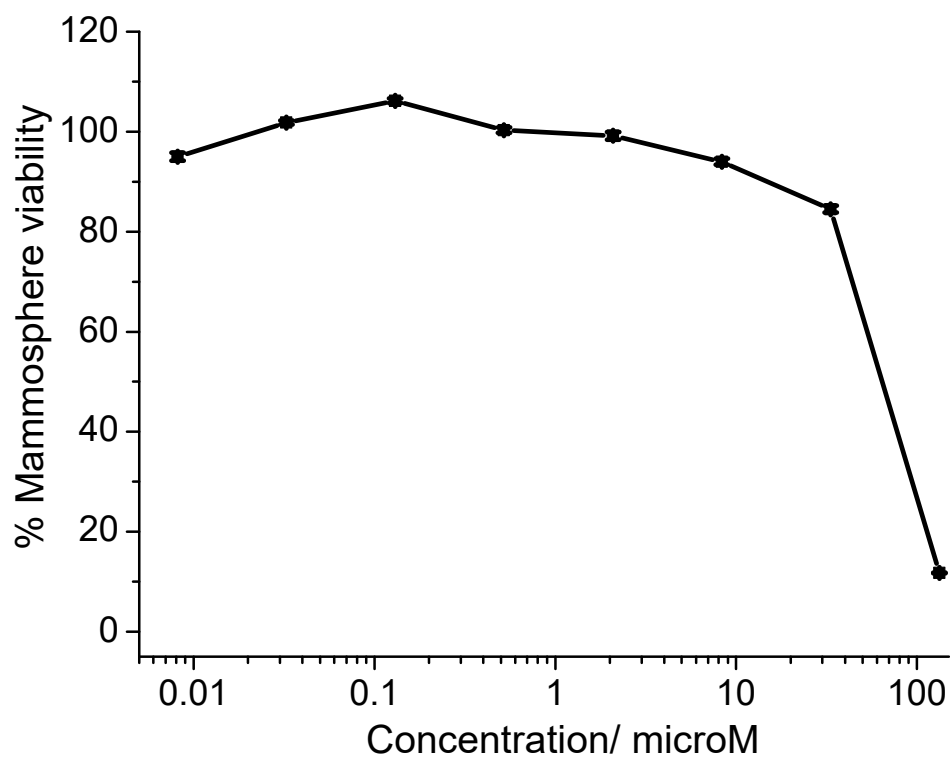

**Figure S33.** Representative dose-response curve for the treatment of HMLER-shEcad mammospheres with  $L^2$  after 5 days incubation.

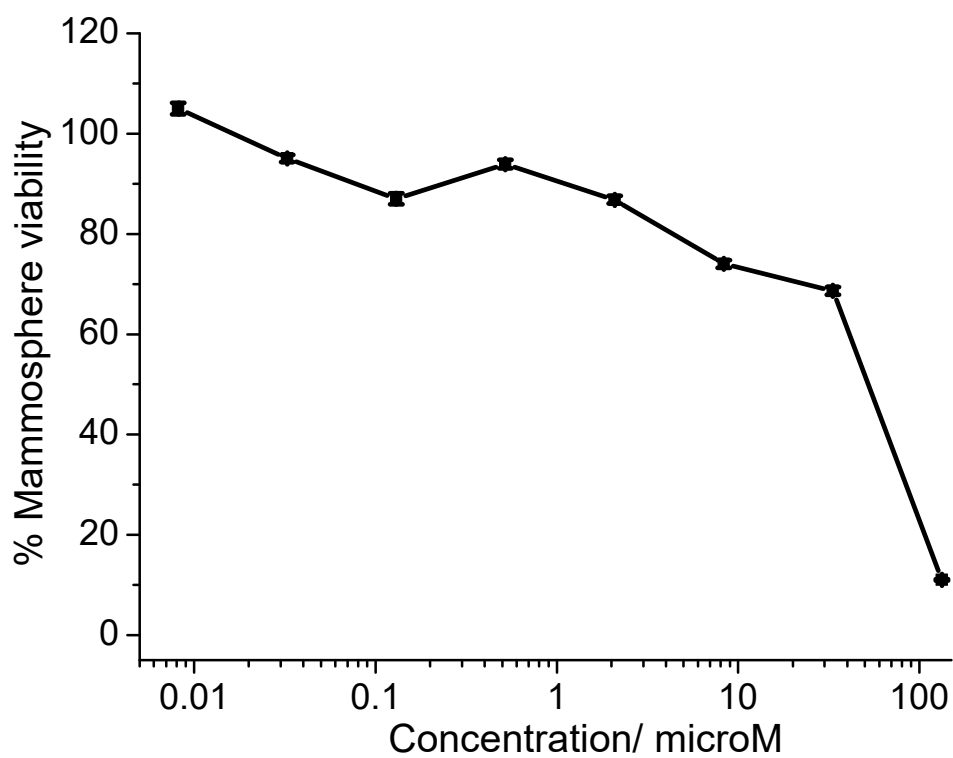



**Figure S34.** Representative dose-response curve for the treatment of HMLER-shEcad mammospheres with  $L^3$  after 5 days incubation.

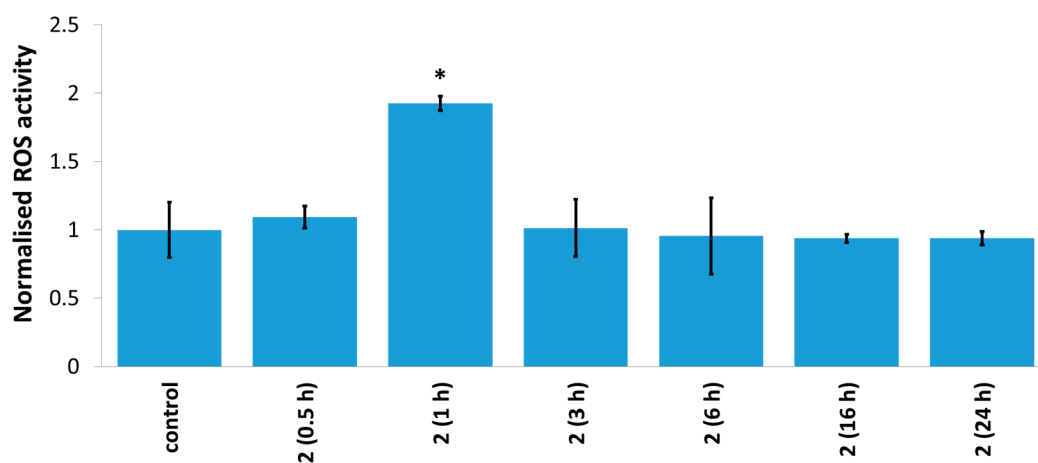

**Figure S35.** Normalised ROS activity in untreated HMLER-shEcad cells (control) and HMLER-shEcad cells treated with 2 ( $2 \times IC_{50}$  value for 0.5, 1, 3, 6, 16, and 24 h). Error bars represent standard deviations and Student *t* test, \* =  $p < 0.05$ .

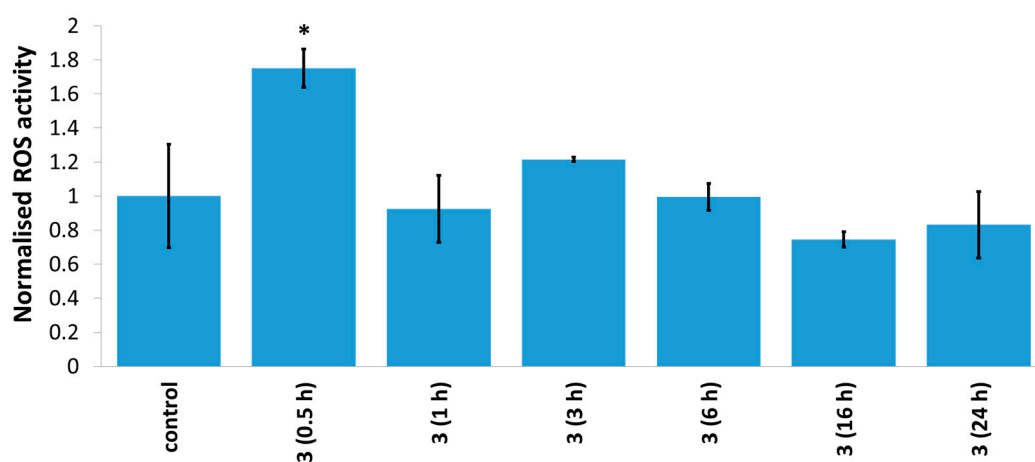

**Figure S36.** Normalised ROS activity in untreated HMLER-shEcad cells (control) and HMLER-shEcad cells treated with 3 ( $2 \times IC_{50}$  value for 0.5, 1, 3, 6, 16, and 24 h). Error bars represent standard deviations and Student *t* test, \* =  $p < 0.05$ .

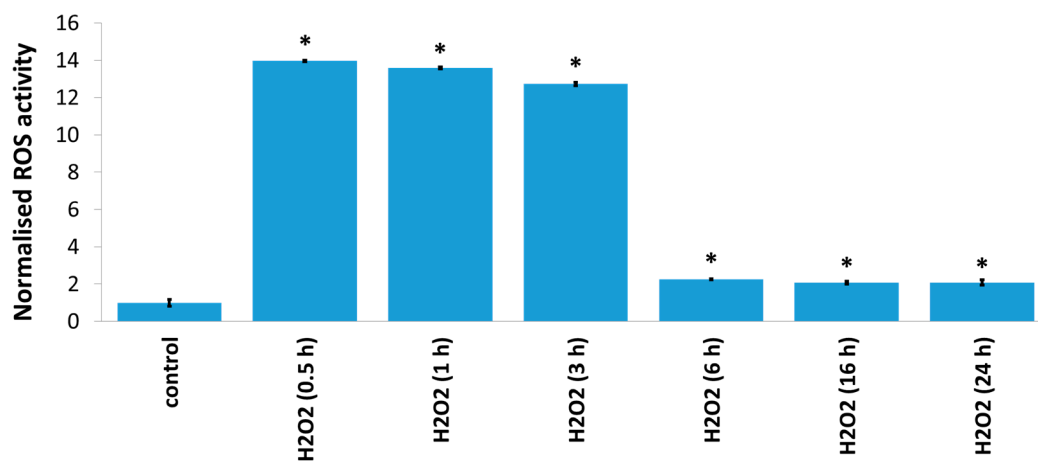

---

**Figure S37.** Normalised ROS activity in untreated HMLER-shEcad cells (control) and HMLER-shEcad cells treated with H<sub>2</sub>O<sub>2</sub> (150 µM for 0.5, 1, 3 6, 16, and 24 h). Error bars represent standard deviations and Student *t test*, \* = *p* < 0.05.
